# Supplementary material for: Anti-spike antibody response to natural SARS-CoV-2 infection in the general population
Source: PubMed Central journal article supplement (PMC8556331; doi:10.1038/s41467-021-26479-2), 2021-10-29
Supplement: 41467_2021_26479_MOESM1_ESM.pdf [file 41467_2021_26479_MOESM1_ESM.pdf]

## **Supplementary information for**

### **Anti-spike antibody response to natural SARS-CoV-2 infection in the general population**

Jia Wei, Philippa C. Matthews, Nicole Stoesser, Thomas Maddox, Luke Lorenzi, Ruth Studley, John I Bell, John N Newton, Jeremy Farrar, Ian Diamond, Emma Rourke, Alison Howarth, Brian D. Marsden, Sarah Hoosdally, E Yvonne Jones, David I Stuart, Derrick W .Crook, Tim E. A. Peto, Koen B. Pouwels, A. Sarah Walker, David W. Eyre and the COVID-19 Infection Survey team

#### **Contents**

- **Supplementary Tables 1-9**
- **Supplementary Figures 1-11**

|                                                                                   | Total (N=7256) | Class 1<br>'seroconverted'<br>(N=4683) | Class 2 'possible<br>late/reinfection'<br>(N=831) | Class 3<br>'seronegative non-<br>responders'<br>(N=1742) | p value (all) | P value (2 vs 1) | P value (3 vs 1) |
|-----------------------------------------------------------------------------------|----------------|----------------------------------------|---------------------------------------------------|----------------------------------------------------------|---------------|------------------|------------------|
| <b>Percentage</b>                                                                 | 100%           | 64.5%                                  | 11.5%                                             | 24.0%                                                    |               |                  |                  |
| <b>Symptoms &amp; Ct value</b>                                                    |                |                                        |                                                   |                                                          | < 0.001       | < 0.001          | < 0.001          |
| <b>No self-reported symptoms &amp; Ct&gt;=30</b>                                  | 1779 (24.5%)   | 132 (2.8%)                             | 528 (63.5%)                                       | 1119 (64.2%)                                             |               |                  |                  |
| <b>No self-reported symptom &amp; Ct&lt;30</b>                                    | 1287 (17.7%)   | 912 (19.5%)                            | 122 (14.7%)                                       | 253 (14.5%)                                              |               |                  |                  |
| <b>Self-reported symptoms &amp; Ct&gt;=30</b>                                     | 1057 (14.6%)   | 641 (13.7%)                            | 128 (15.4%)                                       | 288 (16.5%)                                              |               |                  |                  |
| <b>Self-reported symptom &amp; Ct&lt;30</b>                                       | 3133 (43.2%)   | 2998 (64.0%)                           | 53 (6.4%)                                         | 82 (4.7%)                                                |               |                  |                  |
| <b>Have &gt;=2 positive swabs in the infection episode</b>                        |                |                                        |                                                   |                                                          | < 0.001       | < 0.001          | < 0.001          |
| <b>No</b>                                                                         | 4285 (59.1%)   | 1975 (42.2%)                           | 628 (75.6%)                                       | 1682 (96.6%)                                             |               |                  |                  |
| <b>Yes</b>                                                                        | 2971 (40.9%)   | 2708 (57.8%)                           | 203 (24.4%)                                       | 60 (3.4%)                                                |               |                  |                  |
| <b>Days between first and last positive swab if &gt;=2 positive swabs</b>         |                |                                        |                                                   |                                                          | < 0.001       | 0.002            | < 0.001          |
| <b>Median</b>                                                                     | 14             | 14                                     | 18                                                | 20                                                       |               |                  |                  |
| <b>IQR</b>                                                                        | 7, 26          | 7, 26                                  | 10, 28                                            | 10, 29                                                   |               |                  |                  |
| <b>Have negative study swab before index positive</b>                             |                |                                        |                                                   |                                                          | < 0.001       | < 0.001          | < 0.001          |
| <b>Yes</b>                                                                        | 6203 (85.5%)   | 4032 (86.1%)                           | 603 (72.6%)                                       | 1568 (90.0%)                                             |               |                  |                  |
| <b>No</b>                                                                         | 1053 (14.5%)   | 651 (13.9%)                            | 228 (27.4%)                                       | 174 (10.0%)                                              |               |                  |                  |
| <b>Days between previous negative and index positive</b>                          |                |                                        |                                                   |                                                          | < 0.001       | < 0.001          | < 0.001          |
| <b>Median</b>                                                                     | 26             | 25                                     | 29                                                | 25                                                       |               |                  |                  |
| <b>IQR</b>                                                                        | 12, 35         | 13, 34                                 | 25, 60                                            | 7, 29                                                    |               |                  |                  |
| <b>Have national testing programme positive included within infection episode</b> |                |                                        |                                                   |                                                          | < 0.001       | < 0.001          | < 0.001          |
| <b>No</b>                                                                         | 5675 (78.2%)   | 3210 (68.5%)                           | 756 (91.0%)                                       | 1709 (98.1%)                                             |               |                  |                  |
| <b>Yes</b>                                                                        | 1581 (21.8%)   | 1473 (31.5%)                           | 75 (9.0%)                                         | 33 (1.9%)                                                |               |                  |                  |
| <b>National testing programme positive before study index positive</b>            |                |                                        |                                                   |                                                          | < 0.001       | < 0.001          | < 0.001          |
| <b>No</b>                                                                         | 6053 (83.4%)   | 3570 (76.2%)                           | 764 (91.9%)                                       | 1719 (98.7%)                                             |               |                  |                  |
| <b>Yes</b>                                                                        | 1203 (16.6%)   | 1113 (23.8%)                           | 67 (8.1%)                                         | 23 (1.3%)                                                |               |                  |                  |
| <b>Days between national testing programme positive and study index positive</b>  |                |                                        |                                                   |                                                          | < 0.001       | < 0.001          | < 0.001          |
| <b>Median</b>                                                                     | 7              | 6                                      | 15                                                | 16                                                       |               |                  |                  |
| <b>IQR</b>                                                                        | 3, 14          | 3, 13                                  | 10, 24                                            | 10, 23                                                   |               |                  |                  |

**Supplementary Table 1. Additional characteristics of classes identified from latent class mixed models for 7,256 participants infected with SARS-CoV-2.** Main characteristics among classes are presented in **Table 1**, and continuous variables are presented graphically in **Supplementary Fig. 2**. Continuous variables were compared using Kruskal-Wallis tests, and categorical variables were compared using one-sided Chi-squared tests.

|                                                     | Class 1       | Class 2                   |           |                  | Class 3      |           |                  |
|-----------------------------------------------------|---------------|---------------------------|-----------|------------------|--------------|-----------|------------------|
|                                                     | Seroconverted | Possible late/reinfection |           |                  | Seronegative |           |                  |
|                                                     |               | OR                        | 95%CI     | p-value          | OR           | 95%CI     | p-value          |
| Age                                                 |               | See Fig. 2                |           |                  |              |           |                  |
| Sex                                                 |               |                           |           |                  |              |           |                  |
| Female                                              |               | 1(ref)                    |           |                  | 1(ref)       |           |                  |
| Male                                                |               | 0.98                      | 0.81-1.18 | 0.8              | 0.88         | 0.74-1.04 | 0.1              |
| Ethnicity                                           |               |                           |           |                  |              |           |                  |
| White                                               |               | 1(ref)                    |           |                  | 1(ref)       |           |                  |
| Non-white                                           |               | 1.03                      | 0.75-1.40 | 0.9              | 0.80         | 0.60-1.08 | 0.2              |
| Report having long-term health conditions           |               |                           |           |                  |              |           |                  |
| No                                                  |               | 1(ref)                    |           |                  | 1(ref)       |           |                  |
| Yes                                                 |               | 0.82                      | 0.64-1.04 | 0.1              | 1.10         | 0.90-1.35 | 0.4              |
| Report working in patient facing healthcare         |               |                           |           |                  |              |           |                  |
| No                                                  | ref           | 1(ref)                    |           |                  | 1(ref)       |           |                  |
| Yes                                                 |               | 1.02                      | 0.52-1.96 | 1                | 0.39         | 0.18-0.83 | <b>0.01</b>      |
| Ct value (one unit higher)                          |               | 1.35                      | 1.32-1.39 | <b>&lt;0.001</b> | 1.33         | 1.31-1.36 | <b>&lt;0.001</b> |
| Report having symptoms                              |               |                           |           |                  |              |           |                  |
| No symptoms                                         |               | 1(ref)                    |           |                  | 1(ref)       |           |                  |
| Other symptoms                                      |               | 0.09                      | 0.07-0.13 | <b>&lt;0.001</b> | 0.23         | 0.19-0.29 | <b>&lt;0.001</b> |
| Classic symptoms                                    |               | 0.07                      | 0.05-0.09 | <b>&lt;0.001</b> | 0.07         | 0.06-0.09 | <b>&lt;0.001</b> |
| Have >=2 positive swabs in the infection episode    |               |                           |           |                  |              |           |                  |
| No                                                  |               | 1(ref)                    |           |                  | 1(ref)       |           |                  |
| Yes                                                 |               | 1.13                      | 0.80-1.60 | 0.5              | 0.08         | 0.05-0.13 | <b>&lt;0.001</b> |
| Days between first and last positive (1 day longer) |               | 0.99                      | 0.98-1.00 | 0.1              | 1.00         | 0.98-1.02 | 0.8              |

**Supplementary Table 2. Odds ratio with 95% confidence intervals from multinomial logistic regression, using Class 1 as the reference. See Fig. 2 for effect of age and other factors on the probability scale. The 95% confidence intervals are calculated by prediction  $\pm$  1.96\*standard error of the prediction; two-sided Wald p values are shown. Bold numbers indicate significant p values <0.05.**

|                                                         | Class 1<br>'seroconverted' | Class 3 (A: Using all data):<br>'seronegative non responders' |           |                  | Class 3 (B: Conditioning on Ct ≤32 and<br>≥2 gene positivity) |           |                  |
|---------------------------------------------------------|----------------------------|---------------------------------------------------------------|-----------|------------------|---------------------------------------------------------------|-----------|------------------|
|                                                         |                            | OR                                                            | 95%CI     | p-value          | OR                                                            | 95%CI     | p-value          |
| Age                                                     |                            |                                                               |           | <b>&lt;0.001</b> |                                                               |           | <b>&lt;0.001</b> |
| Sex (Male vs Female)                                    |                            | 0.84                                                          | 0.75-0.96 | <b>0.008</b>     | 0.87                                                          | 0.73-1.04 | 0.1              |
| Ethnicity (Non-White vs White)                          |                            | 0.75                                                          | 0.60-0.94 | <b>0.01</b>      | 0.88                                                          | 0.63-1.20 | 0.4              |
| Report having long-term health conditions (Yes vs No)   |                            | 1.15                                                          | 0.99-1.34 | 0.06             | 0.97                                                          | 0.78-1.21 | 0.8              |
| Report working in patient facing healthcare (Yes vs No) |                            | 0.42                                                          | 0.22-0.75 | <b>0.005</b>     | 0.44                                                          | 0.15-1.02 | 0.09             |
| Cough (Yes vs No)                                       |                            | 0.20                                                          | 0.15-0.25 | <b>&lt;0.001</b> | 0.24                                                          | 0.16-0.35 | <b>&lt;0.001</b> |
| Loss of smell (Yes vs No)                               |                            | 0.21                                                          | 0.13-0.33 | <b>&lt;0.001</b> | 0.34                                                          | 0.17-0.62 | <b>&lt;0.001</b> |
| Fever (Yes vs No)                                       |                            | 0.42                                                          | 0.29-0.60 | <b>&lt;0.001</b> | 0.51                                                          | 0.29-0.84 | <b>0.01</b>      |
| Loss of taste (Yes vs No)                               | ref                        | 0.53                                                          | 0.35-0.79 | <b>0.002</b>     | 0.51                                                          | 0.27-0.89 | <b>0.03</b>      |
| Fatigue/weakness (Yes vs No)                            |                            | 0.58                                                          | 0.44-0.75 | <b>&lt;0.001</b> | 0.69                                                          | 0.46-1.01 | 0.06             |
| Headache (Yes vs No)                                    |                            | 0.69                                                          | 0.54-0.87 | <b>0.003</b>     | 0.54                                                          | 0.37-0.79 | <b>0.002</b>     |
| Sore throat (Yes vs No)                                 |                            | 0.69                                                          | 0.52-0.91 | <b>0.01</b>      | 0.59                                                          | 0.37-0.91 | <b>0.02</b>      |
| Myalgia (Yes vs No)                                     |                            | 0.75                                                          | 0.55-1.02 | 0.07             | 0.70                                                          | 0.43-1.09 | 0.1              |
| Nausea/Vomiting (Yes vs No)                             |                            | 0.93                                                          | 0.59-1.42 | 0.7              | 1.25                                                          | 0.66-2.25 | 0.5              |
| Diarrhoea (Yes vs No)                                   |                            | 1.06                                                          | 0.66-1.68 | 0.8              | 0.88                                                          | 0.39-1.79 | 0.7              |
| Abdominal pain (Yes vs No)                              |                            | 1.07                                                          | 0.62-1.78 | 0.8              | 0.98                                                          | 0.41-2.07 | 1                |
| Shortness of breath (Yes vs No)                         |                            | 1.39                                                          | 0.97-1.95 | 0.07             | 1.60                                                          | 0.97-2.57 | 0.06             |

**Supplementary Table 3. Odds ratio with 95% confidence intervals from logistic regression comparing seronegative vs seroconverting (Class 3 vs Class 1) using demographic factors and individual symptoms that would be available without a positive test result. (A)** Using all data from Class 3 (N=1,742) vs Class 1 (N=4,683). **(B)** Restricting Class 3 to those with Ct value ≤32 and ≥2 genes detected (N=595) to decrease the impact of potential false positive swab tests. Age was fitted using natural cubic spline with one internal knot placed at 50 years and two boundary knots at 20, 80 years. Effect of age is presented in **Supplementary Fig. 4**. The 95% confidence intervals are calculated by prediction ± 1.96\*standard error of the prediction; two-sided Wald p values are shown. Bold numbers indicate significant p values <0.05. Odds ratios and 95% confidence intervals are visually presented in **Fig. 3**.

|                                                         | Class 1<br>'seroconverted' | Class 3 (A: Using all data):<br>'seronegative non responders' |           |                  | Class 3 (B: Conditioning on Ct ≤32 and<br>≥2 gene positivity) |           |                  |
|---------------------------------------------------------|----------------------------|---------------------------------------------------------------|-----------|------------------|---------------------------------------------------------------|-----------|------------------|
|                                                         |                            | OR                                                            | 95%CI     | p-value          | OR                                                            | 95%CI     | p-value          |
| Age                                                     |                            |                                                               |           | <b>&lt;0.001</b> |                                                               |           | <b>&lt;0.001</b> |
| Sex (Male vs Female)                                    |                            | 0.84                                                          | 0.73-0.97 | <b>0.02</b>      | 0.85                                                          | 0.69-1.04 | 0.1              |
| Ethnicity (Non-White vs White)                          |                            | 1.26                                                          | 0.98-1.62 | 0.07             | 1.17                                                          | 0.82-1.69 | 0.4              |
| Report having long-term health conditions (Yes vs No)   |                            | 1.19                                                          | 1.00-1.43 | 0.05             | 1.06                                                          | 0.81-1.38 | 0.7              |
| Report working in patient facing healthcare (Yes vs No) |                            | 0.42                                                          | 0.21-0.84 | <b>0.01</b>      | 0.35                                                          | 0.11-1.13 | 0.08             |
| Cough (Yes vs No)                                       |                            | 0.18                                                          | 0.13-0.24 | <b>&lt;0.001</b> | 0.20                                                          | 0.13-0.33 | <b>&lt;0.001</b> |
| Loss of smell (Yes vs No)                               |                            | 0.21                                                          | 0.12-0.36 | <b>&lt;0.001</b> | 0.31                                                          | 0.15-0.66 | <b>0.002</b>     |
| Fever (Yes vs No)                                       |                            | 0.38                                                          | 0.24-0.58 | <b>&lt;0.001</b> | 0.40                                                          | 0.21-0.77 | <b>0.006</b>     |
| Loss of taste (Yes vs No)                               |                            | 0.45                                                          | 0.28-0.72 | <b>&lt;0.001</b> | 0.47                                                          | 0.23-0.95 | <b>0.03</b>      |
| Fatigue/weakness (Yes vs No)                            |                            | 0.58                                                          | 0.43-0.80 | <b>&lt;0.001</b> | 0.70                                                          | 0.44-1.11 | 0.1              |
| Headache (Yes vs No)                                    |                            | 0.64                                                          | 0.48-0.86 | <b>0.003</b>     | 0.60                                                          | 0.39-0.94 | <b>0.03</b>      |
| Sore throat (Yes vs No)                                 |                            | 0.63                                                          | 0.46-0.88 | <b>0.006</b>     | 0.55                                                          | 0.32-0.92 | <b>0.02</b>      |
| Myalgia (Yes vs No)                                     |                            | 0.83                                                          | 0.59-1.18 | 0.3              | 0.66                                                          | 0.38-1.15 | 0.1              |
| Nausea/Vomiting (Yes vs No)                             |                            | 0.84                                                          | 0.50-1.43 | 0.5              | 1.11                                                          | 0.52-2.35 | 0.8              |
| Diarrhoea (Yes vs No)                                   |                            | 0.95                                                          | 0.53-1.72 | 0.9              | 0.74                                                          | 0.27-2.01 | 0.6              |
| Abdominal pain (Yes vs No)                              |                            | 0.96                                                          | 0.50-1.83 | 0.9              | 0.96                                                          | 0.35-2.63 | 0.9              |
| Shortness of breath (Yes vs No)                         | ref                        | 1.39                                                          | 0.93-2.10 | 0.1              | 1.39                                                          | 0.76-2.53 | 0.3              |
| Angina (Yes vs No)                                      |                            | 0.96                                                          | 0.43-2.14 | 0.9              | 1.04                                                          | 0.38-2.82 | 0.9              |
| Asthma (Yes vs No)                                      |                            | 0.84                                                          | 0.66-1.06 | 0.1              | 0.93                                                          | 0.67-1.30 | 0.7              |
| Atrial fibrillation (Yes vs No)                         |                            | 1.07                                                          | 0.59-1.94 | 0.8              | 1.04                                                          | 0.46-2.35 | 0.9              |
| Cancer (Yes vs No)                                      |                            | 1.07                                                          | 0.80-1.43 | 0.6              | 1.03                                                          | 0.69-1.56 | 0.9              |
| Chronic kidney disease (Yes vs No)                      |                            | 1.13                                                          | 0.70-1.84 | 0.6              | 0.94                                                          | 0.46-1.94 | 0.9              |
| Chronic liver disease (Yes vs No)                       |                            | 0.88                                                          | 0.39-1.99 | 0.8              | 0.92                                                          | 0.29-2.94 | 0.9              |
| COPD (Yes vs No)                                        |                            | 0.69                                                          | 0.40-1.17 | 0.2              | 1.37                                                          | 0.72-2.60 | 0.3              |
| Coronary heart disease (Yes vs No)                      |                            | 0.99                                                          | 0.40-2.43 | 1                | 1.19                                                          | 0.39-3.66 | 0.8              |
| Frailty (Yes vs No)                                     |                            | 0.64                                                          | 0.41-1.01 | 0.05             | 0.48                                                          | 0.24-0.98 | <b>0.04</b>      |
| Heart failure (Yes vs No)                               |                            | 0.97                                                          | 0.37-2.60 | 1                | 0.93                                                          | 0.26-3.35 | 0.9              |
| Hypertension (Yes vs No)                                |                            | 0.87                                                          | 0.64-1.17 | 0.3              | 0.81                                                          | 0.52-1.24 | 0.3              |
| Myocardial infarction (Yes vs No)                       |                            | 1.45                                                          | 0.61-3.48 | 0.4              | 1.21                                                          | 0.37-3.98 | 0.8              |
| Osteoporosis (Yes vs No)                                |                            | 2.00                                                          | 1.07-3.73 | <b>0.03</b>      | 1.33                                                          | 0.52-3.42 | 0.6              |
| Peripheral arterial disease (Yes vs No)                 |                            | 0.66                                                          | 0.32-1.37 | 0.3              | 0.63                                                          | 0.22-1.81 | 0.4              |
| Rheumatoid arthritis (Yes vs No)                        |                            | 0.82                                                          | 0.32-2.12 | 0.7              | 0.89                                                          | 0.23-3.53 | 0.9              |

|                                                           |      |           |                  |      |            |      |
|-----------------------------------------------------------|------|-----------|------------------|------|------------|------|
| Stroke (Yes vs No)                                        | 1.11 | 0.47-2.62 | 0.8              | 0.53 | 0.11-2.59  | 0.4  |
| Transient ischaemic attack (Yes vs No)                    | 0.77 | 0.32-1.84 | 0.6              | 1.50 | 0.50-4.50  | 0.5  |
| Type 1 diabetes (Yes vs No)                               | 3.06 | 0.95-9.85 | 0.06             | 3.10 | 0.52-18.55 | 0.2  |
| Type 2 diabetes (Yes vs No)                               | 1.29 | 0.76-2.18 | 0.3              | 0.94 | 0.43-2.05  | 0.9  |
| Overweight (BMI 25 to <30 kg/m <sup>2</sup> ) (Yes vs No) | 0.73 | 0.61-0.88 | <b>&lt;0.001</b> | 0.80 | 0.61-1.05  | 0.1  |
| Obese (BMI ≥30 kg/m <sup>2</sup> ) (Yes vs No)            | 0.84 | 0.68-1.03 | 0.1              | 0.88 | 0.65-1.19  | 0.4  |
| Antihypertensive medication (Yes vs No)                   | 1.00 | 0.76-1.33 | 1                | 0.95 | 0.64-1.42  | 0.8  |
| Diabetes medication (Yes vs No)                           | 0.47 | 0.26-0.86 | <b>0.01</b>      | 0.45 | 0.17-1.15  | 0.09 |
| Corticosteroids (Yes vs No)                               | 1.53 | 0.87-2.71 | 0.1              | 0.83 | 0.34-2.04  | 0.7  |
| Immunosuppressants (Yes vs No)                            | 0.79 | 0.31-2.05 | 0.6              | 0.96 | 0.24-3.81  | 1    |

**Supplementary Table 4. Odds ratio with 95% confidence intervals from a logistic regression model comparing seronegative vs seroconverting participants (Class 3 vs Class 1) using demographic factors, individual symptoms, and comorbidities. (A)** Using all data from Class 3 (N=1,383) vs Class 1 (N=4,032). **(B)** Restricting Class 3 to those with Ct value ≤32 and ≥2 genes detected (N=487) to decrease the impact of potential false positive swab tests. Age was fitted using natural cubic spline with one internal knot placed at 50 years and two boundary knots at 20, 80 years. Comorbidities were obtained by linkage to the General Practice Extraction Service (GPES) Data for Pandemic Planning and Research and Hospital Episode Statistics (HES) via the NHS number. The 95% confidence intervals are calculated by prediction ± 1.96\*standard error of the prediction; two-sided Wald p values are shown. Bold numbers indicate significant p values <0.05.

|                                                |                             | Peak level (ng ml <sup>-1</sup> ) |         |     | Half-life (days) |         |     |
|------------------------------------------------|-----------------------------|-----------------------------------|---------|-----|------------------|---------|-----|
|                                                |                             | Posterior mean                    | 95% CrI |     | Posterior mean   | 95% CrI |     |
| <b>Model from 56 days after index positive</b> | Censored at 800 (base case) | 203                               | 190     | 210 | 184              | 163     | 210 |
|                                                | Censored at 500             | 194                               | 189     | 200 | 187              | 168     | 209 |
|                                                | Censored at 400             | 189                               | 183     | 194 | 192              | 172     | 215 |
| <b>Model from 28 days after index positive</b> | Censored at 800             | 225                               | 213     | 232 | 189              | 171     | 211 |
|                                                | Censored at 500             | 216                               | 210     | 222 | 184              | 168     | 202 |
|                                                | Censored at 400             | 209                               | 204     | 215 | 187              | 172     | 204 |
| <b>Model from 84 days after index positive</b> | Censored at 800             | 177                               | 164     | 184 | 225              | 182     | 287 |
|                                                | Censored at 500             | 168                               | 163     | 175 | 233              | 192     | 290 |
|                                                | Censored at 400             | 164                               | 158     | 170 | 242              | 199     | 305 |

**Supplementary Table 5. Sensitivity analysis using different starting point (28, 84 days) and different censoring threshold (400, 500 ng ml<sup>-1</sup>) for anti-spike IgG trajectory modelling (peak and half-life estimation).**

|                      |                     | Estimate | Est.Error | 95%CrI  |         | Rhat   | Bulk_ESS | Tail_ESS |
|----------------------|---------------------|----------|-----------|---------|---------|--------|----------|----------|
| <b>Baseline</b>      | Intercept           | 7.6636   | 0.0247    | 7.6149  | 7.7119  | 1.0020 | 2802     | 4046     |
|                      | time                | -0.0054  | 0.0003    | -0.0061 | -0.0048 | 1.0004 | 8113     | 6588     |
|                      | sigma               | 0.5165   | 0.0117    | 0.4943  | 0.5401  | 1.0045 | 261      | 856      |
|                      | sd(Intercept)       | 1.0406   | 0.0250    | 0.9925  | 1.0895  | 1.0010 | 651      | 1953     |
|                      | sd(time)            | 0.0043   | 0.0009    | 0.0021  | 0.0058  | 1.0087 | 137      | 211      |
|                      | cor(Intercept,time) | -0.2576  | 0.0976    | -0.4166 | -0.0467 | 1.0015 | 1365     | 1047     |
| <b>Age</b>           | Intercept           | 7.6405   | 0.0244    | 7.5932  | 7.6881  | 1.0016 | 2299     | 4221     |
|                      | time                | -0.0049  | 0.0004    | -0.0057 | -0.0042 | 1.0006 | 6927     | 6056     |
|                      | age                 | 0.1194   | 0.0163    | 0.0871  | 0.1509  | 1.0044 | 1988     | 3551     |
|                      | time:age            | -0.0001  | 0.0002    | -0.0005 | 0.0004  | 1.0015 | 5853     | 6699     |
|                      | sigma               | 0.5164   | 0.0117    | 0.4935  | 0.5398  | 1.0151 | 304      | 798      |
|                      | sd(Intercept)       | 1.0222   | 0.0239    | 0.9762  | 1.0695  | 1.0078 | 645      | 2515     |
|                      | sd(time)            | 0.0043   | 0.0009    | 0.0023  | 0.0058  | 1.0355 | 147      | 186      |
|                      | cor(Intercept,time) | -0.2409  | 0.0943    | -0.4008 | -0.0338 | 1.0057 | 920      | 906      |
| <b>Sex</b>           | Intercept           | 7.6376   | 0.0339    | 7.5700  | 7.7040  | 1.0012 | 2330     | 4247     |
|                      | time                | -0.0044  | 0.0005    | -0.0053 | -0.0034 | 1.0005 | 5928     | 6931     |
|                      | sex                 | 0.0531   | 0.0488    | -0.0429 | 0.1486  | 1.0007 | 2225     | 3689     |
|                      | time:sex            | -0.0022  | 0.0007    | -0.0035 | -0.0009 | 1.0005 | 6714     | 6566     |
|                      | sigma               | 0.5179   | 0.0118    | 0.4954  | 0.5417  | 1.0218 | 224      | 421      |
|                      | sd(Intercept)       | 1.0393   | 0.0246    | 0.9910  | 1.0879  | 1.0076 | 575      | 2035     |
|                      | sd(time)            | 0.0041   | 0.0010    | 0.0015  | 0.0057  | 1.0448 | 119      | 113      |
|                      | cor(Intercept,time) | -0.2615  | 0.1057    | -0.4333 | -0.0319 | 1.0069 | 1667     | 1136     |
| <b>Ethnicity</b>     | Intercept           | 7.6216   | 0.0259    | 7.5706  | 7.6722  | 1.0019 | 2110     | 3747     |
|                      | time                | -0.0053  | 0.0004    | -0.0060 | -0.0046 | 1.0008 | 5942     | 6477     |
|                      | ethnicity           | 0.4344   | 0.0833    | 0.2660  | 0.5929  | 1.0005 | 2263     | 4012     |
|                      | time:ethnicity      | -0.0018  | 0.0011    | -0.0039 | 0.0004  | 1.0001 | 5954     | 6204     |
|                      | sigma               | 0.5163   | 0.0115    | 0.4937  | 0.5392  | 1.0052 | 267      | 1149     |
|                      | sd(Intercept)       | 1.0340   | 0.0245    | 0.9880  | 1.0831  | 1.0038 | 626      | 2504     |
|                      | sd(time)            | 0.0043   | 0.0009    | 0.0024  | 0.0059  | 1.0131 | 113      | 334      |
|                      | cor(Intercept,time) | -0.2512  | 0.0927    | -0.4074 | -0.0427 | 1.0033 | 953      | 1222     |
| <b>LTHC</b>          | Intercept           | 7.6294   | 0.0276    | 7.5750  | 7.6833  | 1.0011 | 2125     | 4128     |
|                      | time                | -0.0054  | 0.0004    | -0.0062 | -0.0047 | 1.0004 | 7285     | 6868     |
|                      | LTHC                | 0.1646   | 0.0630    | 0.0416  | 0.2879  | 1.0006 | 2121     | 3843     |
|                      | time:LTHC           | 0.0002   | 0.0009    | -0.0017 | 0.0020  | 1.0007 | 5814     | 6214     |
|                      | sigma               | 0.5188   | 0.0119    | 0.4959  | 0.5429  | 1.0308 | 213      | 568      |
|                      | sd(Intercept)       | 1.0347   | 0.0248    | 0.9870  | 1.0828  | 1.0145 | 484      | 842      |
|                      | sd(time)            | 0.0040   | 0.0010    | 0.0014  | 0.0057  | 1.0409 | 122      | 238      |
|                      | cor(Intercept,time) | -0.2406  | 0.1093    | -0.4122 | 0.0049  | 1.0076 | 1159     | 747      |
| <b>Ct value</b>      | Intercept           | 7.6610   | 0.0247    | 7.6127  | 7.7098  | 1.0008 | 2161     | 4383     |
|                      | time                | -0.0055  | 0.0004    | -0.0062 | -0.0048 | 1.0001 | 7177     | 6326     |
|                      | ct                  | 0.0056   | 0.0040    | -0.0024 | 0.0133  | 1.0015 | 2173     | 4200     |
|                      | time:ct             | 0.0000   | 0.0001    | -0.0001 | 0.0001  | 1.0002 | 6296     | 7132     |
|                      | sigma               | 0.5170   | 0.0117    | 0.4953  | 0.5414  | 1.0088 | 217      | 293      |
|                      | sd(Intercept)       | 1.0390   | 0.0244    | 0.9914  | 1.0869  | 1.0044 | 530      | 1126     |
|                      | sd(time)            | 0.0042   | 0.0010    | 0.0016  | 0.0058  | 1.0200 | 108      | 168      |
|                      | cor(Intercept,time) | -0.2540  | 0.1041    | -0.4155 | -0.0414 | 1.0059 | 947      | 507      |
| <b>Symptom</b>       | Intercept           | 7.6801   | 0.0543    | 7.5737  | 7.7884  | 1.0004 | 2481     | 4294     |
|                      | time                | -0.0066  | 0.0008    | -0.0081 | -0.0051 | 1.0002 | 6162     | 5701     |
|                      | symptom             | -0.0195  | 0.0608    | -0.1395 | 0.0996  | 1.0012 | 2486     | 4307     |
|                      | time:symptom        | 0.0014   | 0.0009    | -0.0002 | 0.0031  | 1.0002 | 5915     | 6392     |
|                      | sigma               | 0.5157   | 0.0126    | 0.4922  | 0.5411  | 1.0200 | 223      | 475      |
|                      | sd(Intercept)       | 1.0407   | 0.0256    | 0.9900  | 1.0907  | 1.0118 | 428      | 1126     |
|                      | sd(time)            | 0.0043   | 0.0010    | 0.0019  | 0.0060  | 1.0330 | 117      | 155      |
|                      | cor(Intercept,time) | -0.2565  | 0.0982    | -0.4161 | -0.0412 | 1.0071 | 845      | 818      |
| <b>Multivariable</b> | Intercept           | 7.5307   | 0.0603    | 7.4120  | 7.6482  | 1.0022 | 2235     | 3459     |
|                      | time                | -0.0045  | 0.0009    | -0.0062 | -0.0027 | 1.0003 | 6706     | 5743     |
|                      | age                 | 0.1336   | 0.0169    | 0.1011  | 0.1672  | 1.0001 | 2283     | 4077     |
|                      | sex                 | 0.0464   | 0.0488    | -0.0510 | 0.1416  | 1.0009 | 2368     | 4226     |
|                      | ethnicity           | 0.5297   | 0.0817    | 0.3720  | 0.6927  | 1.0006 | 2408     | 3995     |



|                     |         |        |         |         |        |      |      |
|---------------------|---------|--------|---------|---------|--------|------|------|
| LTHC                | 0.0994  | 0.0613 | -0.0178 | 0.2175  | 1.0009 | 2373 | 4184 |
| ct                  | 0.0091  | 0.0040 | 0.0012  | 0.0168  | 1.0000 | 2178 | 3914 |
| symptom             | 0.0088  | 0.0593 | -0.1065 | 0.1269  | 1.0028 | 2029 | 4134 |
| time:age            | -0.0002 | 0.0002 | -0.0007 | 0.0003  | 1.0001 | 6309 | 6334 |
| time:sex            | -0.0021 | 0.0007 | -0.0034 | -0.0008 | 1.0002 | 7569 | 6581 |
| time:ethnicity      | -0.0021 | 0.0011 | -0.0042 | 0.0000  | 1.0003 | 6654 | 7010 |
| time:LTHC           | 0.0000  | 0.0009 | -0.0018 | 0.0018  | 1.0004 | 7363 | 7377 |
| time:ct             | 0.0000  | 0.0001 | -0.0001 | 0.0001  | 0.9999 | 7213 | 6771 |
| time:symptom        | 0.0009  | 0.0009 | -0.0007 | 0.0027  | 1.0002 | 5384 | 6424 |
| sigma               | 0.5186  | 0.0122 | 0.4950  | 0.5431  | 1.0040 | 224  | 406  |
| sd(Intercept)       | 1.0064  | 0.0252 | 0.9576  | 1.0563  | 1.0038 | 385  | 931  |
| sd(time)            | 0.0038  | 0.0012 | 0.0008  | 0.0056  | 1.0160 | 131  | 171  |
| cor(Intercept,time) | -0.2162 | 0.1272 | -0.4037 | 0.0933  | 1.0030 | 586  | 326  |

**Supplementary Table 6. Model coefficients and MCMC diagnostics for the univariable and multivariable models.** The reference category in the multivariable model is: 43-year-old, female, white ethnicity, no long-term health conditions, Ct value=22, and no self-reported symptoms.

|                    |                                         | Multivariable model |         |     |
|--------------------|-----------------------------------------|---------------------|---------|-----|
|                    |                                         | Posterior mean      | 95% CrI |     |
| <b>Baseline</b>    | Peak level (Intercept)                  | 178                 | 151     | 195 |
|                    | IgG half-life (slope)                   | 256                 | 168     | 439 |
| <b>Age</b>         | Peak level: 43 years (median)           |                     |         |     |
|                    | IgG half-life: 43 years (median)        |                     |         |     |
|                    | Change in peak level: per 10-year older | 18*                 | 14      | 23  |
|                    | Change in half-life: per 10-year older  | -12                 | -54     | 22  |
| <b>Sex</b>         | Peak level: Female                      |                     |         |     |
|                    | IgG half-life: Female                   |                     |         |     |
|                    | Change in peak level: Male              | 6                   | -6      | 18  |
|                    | Change in half-life: Male               | -92*                | -236    | -25 |
| <b>Ethnicity</b>   | Peak level: White                       |                     |         |     |
|                    | IgG half-life: White                    |                     |         |     |
|                    | Change in peak level: Non-white         | 78*                 | 50      | 107 |
|                    | Change in half-life: Non-white          | -85                 | -223    | 5   |
| <b>LTHC</b>        | Peak level: No                          |                     |         |     |
|                    | IgG half-life: No                       |                     |         |     |
|                    | Change in peak level: Yes               | 13                  | -2      | 30  |
|                    | Change in half-life: Yes                | 15                  | -115    | 227 |
| <b>Ct value</b>    | Peak level: 22 (median)                 |                     |         |     |
|                    | IgG half-life: 22 (median)              |                     |         |     |
|                    | Change in peak level: per 1 unit higher | 1*                  | 0       | 2   |
|                    | Change in half-life: per 1 unit higher  | 0                   | -9      | 9   |
| <b>Symptom</b>     | Peak level: No                          |                     |         |     |
|                    | IgG half-life: No                       |                     |         |     |
|                    | Change in peak level: Yes               | 1                   | -14     | 15  |
|                    | Change in half-life: Yes                | 73                  | -76     | 236 |
| <b>Time period</b> | Peak level: Pre-Alpha                   |                     |         |     |
|                    | IgG half-life: Pre-Alpha                |                     |         |     |
|                    | Change in peak level: Alpha             | 12                  | -1      | 25  |
|                    | Change in half-life: Alpha              | -35                 | -153    | 46  |

**Supplementary Table 7. Posterior mean and 95% credibility intervals for anti-spike IgG peak level (intercept) ( $\text{ng ml}^{-1}$ ) and half-life (slope) (days) in multivariable model including the time period factor (pre-Alpha vs Alpha) in 3,271 participants in Class 1.** Pre-Alpha period: before 16 Nov 2020; Alpha period: 17 Nov 2020-16 May 2021. Due to the short follow-up time in Delta period (after 17 May 2021), no Delta period participants are included. The reference category is: 43-year-old, female, white ethnicity, no long-term health conditions, Ct value=22, no self-reported symptoms, and in pre-Alpha period. \* indicates where the multivariable 95% CrI excludes 0 (no effect).

|                               |                  | Biphasic exponential model |          |                        |          |                       |          | Linear exponential model |          |                        |          |                       |          |
|-------------------------------|------------------|----------------------------|----------|------------------------|----------|-----------------------|----------|--------------------------|----------|------------------------|----------|-----------------------|----------|
| <b>A</b>                      |                  | 42 ng ml <sup>-1</sup>     |          | 28 ng ml <sup>-1</sup> |          | 6 ng ml <sup>-1</sup> |          | 42 ng ml <sup>-1</sup>   |          | 28 ng ml <sup>-1</sup> |          | 6 ng ml <sup>-1</sup> |          |
| Age                           | Sex&ethnicity    | Estimate                   | 95%CrI   | Estimate               | 95%CrI   | Estimate              | 95%CrI   | Estimate                 | 95%CrI   | Estimate               | 95%CrI   | Estimate              | 95%CrI   |
| <b>20</b>                     | White female     | 590                        | 270-2176 | 762                    | 402-2879 | 1430                  | 817-5825 | 502                      | 239-980  | 644                    | 364-1232 | 1186                  | 782-2051 |
|                               | Non-white female | 485                        | 278-1138 | 593                    | 362-1389 | 1012                  | 640-2458 | 436                      | 261-747  | 530                    | 341-898  | 887                   | 621-1470 |
|                               | White male       | 407                        | 207-758  | 520                    | 309-952  | 955                   | 639-1761 | 361                      | 192-580  | 454                    | 280-698  | 815                   | 590-1180 |
|                               | Non-white male   | 380                        | 235-656  | 463                    | 302-796  | 775                   | 535-1341 | 347                      | 220-526  | 417                    | 281-619  | 686                   | 504-980  |
| <b>40</b>                     | White female     | 649                        | 329-1859 | 817                    | 463-2277 | 1466                  | 888-4186 | 529                      | 289-926  | 660                    | 409-1117 | 1163                  | 802-1909 |
|                               | Non-white female | 524                        | 313-1155 | 630                    | 389-1429 | 1040                  | 670-2395 | 457                      | 284-748  | 547                    | 364-875  | 885                   | 631-1406 |
|                               | White male       | 449                        | 251-778  | 562                    | 350-936  | 988                   | 687-1634 | 386                      | 228-590  | 476                    | 308-697  | 817                   | 609-1122 |
|                               | Non-white male   | 410                        | 262-699  | 495                    | 329-824  | 801                   | 565-1365 | 366                      | 240-536  | 433                    | 299-627  | 693                   | 522-972  |
| <b>60</b>                     | White female     | 703                        | 371-2654 | 869                    | 482-3145 | 1500                  | 871-5973 | 552                      | 316-989  | 673                    | 418-1196 | 1140                  | 781-1966 |
|                               | Non-white female | 561                        | 334-1456 | 667                    | 407-1710 | 1070                  | 669-2827 | 476                      | 306-798  | 562                    | 378-917  | 884                   | 628-1448 |
|                               | White male       | 490                        | 286-923  | 600                    | 376-1123 | 1017                  | 685-1909 | 408                      | 251-623  | 495                    | 330-737  | 819                   | 605-1158 |
|                               | Non-white male   | 441                        | 285-809  | 520                    | 343-962  | 826                   | 571-1532 | 385                      | 258-565  | 448                    | 317-651  | 699                   | 525-1000 |
| <b>80</b>                     | White female     | 755                        | 374-7812 | 917                    | 470-7812 | 1534                  | 813-7812 | 571                      | 335-1180 | 686                    | 422-1385 | 1119                  | 733-2056 |
|                               | Non-white female | 598                        | 347-2267 | 703                    | 411-2819 | 1097                  | 650-4521 | 495                      | 320-896  | 574                    | 380-1023 | 882                   | 613-1605 |
|                               | White male       | 531                        | 308-1348 | 638                    | 385-1674 | 1050                  | 655-2866 | 430                      | 272-692  | 511                    | 341-817  | 821                   | 587-1276 |
|                               | Non-white male   | 471                        | 300-1017 | 551                    | 357-1211 | 851                   | 557-1920 | 400                      | 275-618  | 464                    | 327-712  | 704                   | 515-1075 |
| <b>B</b>                      |                  | 42 ng ml <sup>-1</sup>     |          | 28 ng ml <sup>-1</sup> |          | 6 ng ml <sup>-1</sup> |          | 42 ng ml <sup>-1</sup>   |          | 28 ng ml <sup>-1</sup> |          | 6 ng ml <sup>-1</sup> |          |
| Group                         | Multiplier       | Estimate                   | 95%CrI   | Estimate               | 95%CrI   | Estimate              | 95%CrI   | Estimate                 | 95%CrI   | Estimate               | 95%CrI   | Estimate              | 95%CrI   |
| <b>60-year-old white male</b> | 1                | 490                        | 286-923  | 600                    | 376-1123 | 1017                  | 685-1909 | 408                      | 251-623  | 495                    | 330-737  | 819                   | 605-1158 |
|                               | 2                | 301                        | 118-616  | 412                    | 221-797  | 830                   | 548-1557 | 261                      | 112-441  | 347                    | 195-552  | 673                   | 486-970  |
|                               | 3                | 191                        | 57-426   | 301                    | 118-616  | 720                   | 467-1341 | 178                      | 57-341   | 261                    | 112-441  | 588                   | 412-853  |
|                               | 5                | 71                         | 57-247   | 162                    | 57-391   | 581                   | 361-1093 | 68                       | 57-222   | 155                    | 57-323   | 479                   | 312-714  |
|                               | 10               | 56                         | 57-69    | 56                     | 57-164   | 394                   | 202-747  | 58                       | 57-75    | 58                     | 57-161   | 333                   | 183-530  |

|                                 |    |     |          |     |          |      |          |     |         |     |          |      |          |
|---------------------------------|----|-----|----------|-----|----------|------|----------|-----|---------|-----|----------|------|----------|
| <b>60-year-old white female</b> | 1  | 700 | 369-2616 | 868 | 489-3290 | 1498 | 873-5864 | 551 | 317-990 | 674 | 425-1184 | 1138 | 776-1955 |
|                                 | 2  | 418 | 141-1498 | 586 | 283-2035 | 1218 | 701-4483 | 344 | 131-660 | 463 | 241-842  | 930  | 625-1596 |
|                                 | 3  | 253 | 57-907   | 418 | 141-1498 | 1051 | 594-3942 | 218 | 57-486  | 344 | 131-660  | 809  | 525-1406 |
|                                 | 5  | 70  | 57-390   | 210 | 57-775   | 841  | 457-3124 | 64  | 57-305  | 186 | 57-450   | 653  | 404-1154 |
|                                 | 10 | 56  | 57-64    | 56  | 57-209   | 553  | 255-1999 | 58  | 57-69   | 58  | 57-196   | 444  | 224-826  |

**Supplementary Table 8. A) Posterior predicted days with 95% credibility interval from the start of infection to three anti-spike IgG thresholds (42, 28, and 6 ng ml<sup>-1</sup>) by age (20, 40, 60, 80 years), sex, and ethnicity in the multivariable biphasic exponential model and linear exponential model. B) Posterior predicted days with 95% credibility interval from the start of infection to thresholds (42, 28, and 6 ng ml<sup>-1</sup>) multiplied by 2, 3, 5, 10 in 60-year-old white male and female population in the multivariable biphasic exponential model and linear exponential model.**

| <b>Model term</b>                                                       | <b>Priors</b>         |
|-------------------------------------------------------------------------|-----------------------|
| <b>Intercept</b>                                                        | normal (7.4, 2.8)     |
| <b>Slope</b>                                                            | normal (0, 0.1)       |
| <b>Coefficient for change in intercept (age)</b>                        | normal (0, 2)         |
| <b>Coefficient for change in slope (age)</b>                            | normal (0, 0.1)       |
| <b>Coefficient for change in intercept (sex)</b>                        | normal (0, 6)         |
| <b>Coefficient for change in slope (sex)</b>                            | normal (0, 0.1)       |
| <b>Coefficient for change in intercept (ethnicity)</b>                  | normal (0, 10)        |
| <b>Coefficient for change in slope (ethnicity)</b>                      | normal (0, 0.2)       |
| <b>Coefficient for change in intercept (long-term health condition)</b> | normal (0, 7)         |
| <b>Coefficient for change in slope (long-term health condition)</b>     | normal (0, 0.2)       |
| <b>Coefficient for change in intercept (Ct)</b>                         | normal (0, 1)         |
| <b>Coefficient for change in slope (Ct)</b>                             | normal (0, 0.1)       |
| <b>Coefficient for change in intercept (symptom)</b>                    | normal (0, 6)         |
| <b>Coefficient for change in slope (symptom)</b>                        | normal (0, 0.1)       |
| <b>Random effect SD: intercept</b>                                      | normal (0, 1)         |
| <b>Random effect SD: slope</b>                                          | normal (0, 0.01)      |
| <b>Random effect intercept &amp; slope covariance</b>                   | lkj_corr_cholesky (2) |

**Supplementary Table 9. Priors used in the Bayesian linear mixed interval censored models.**

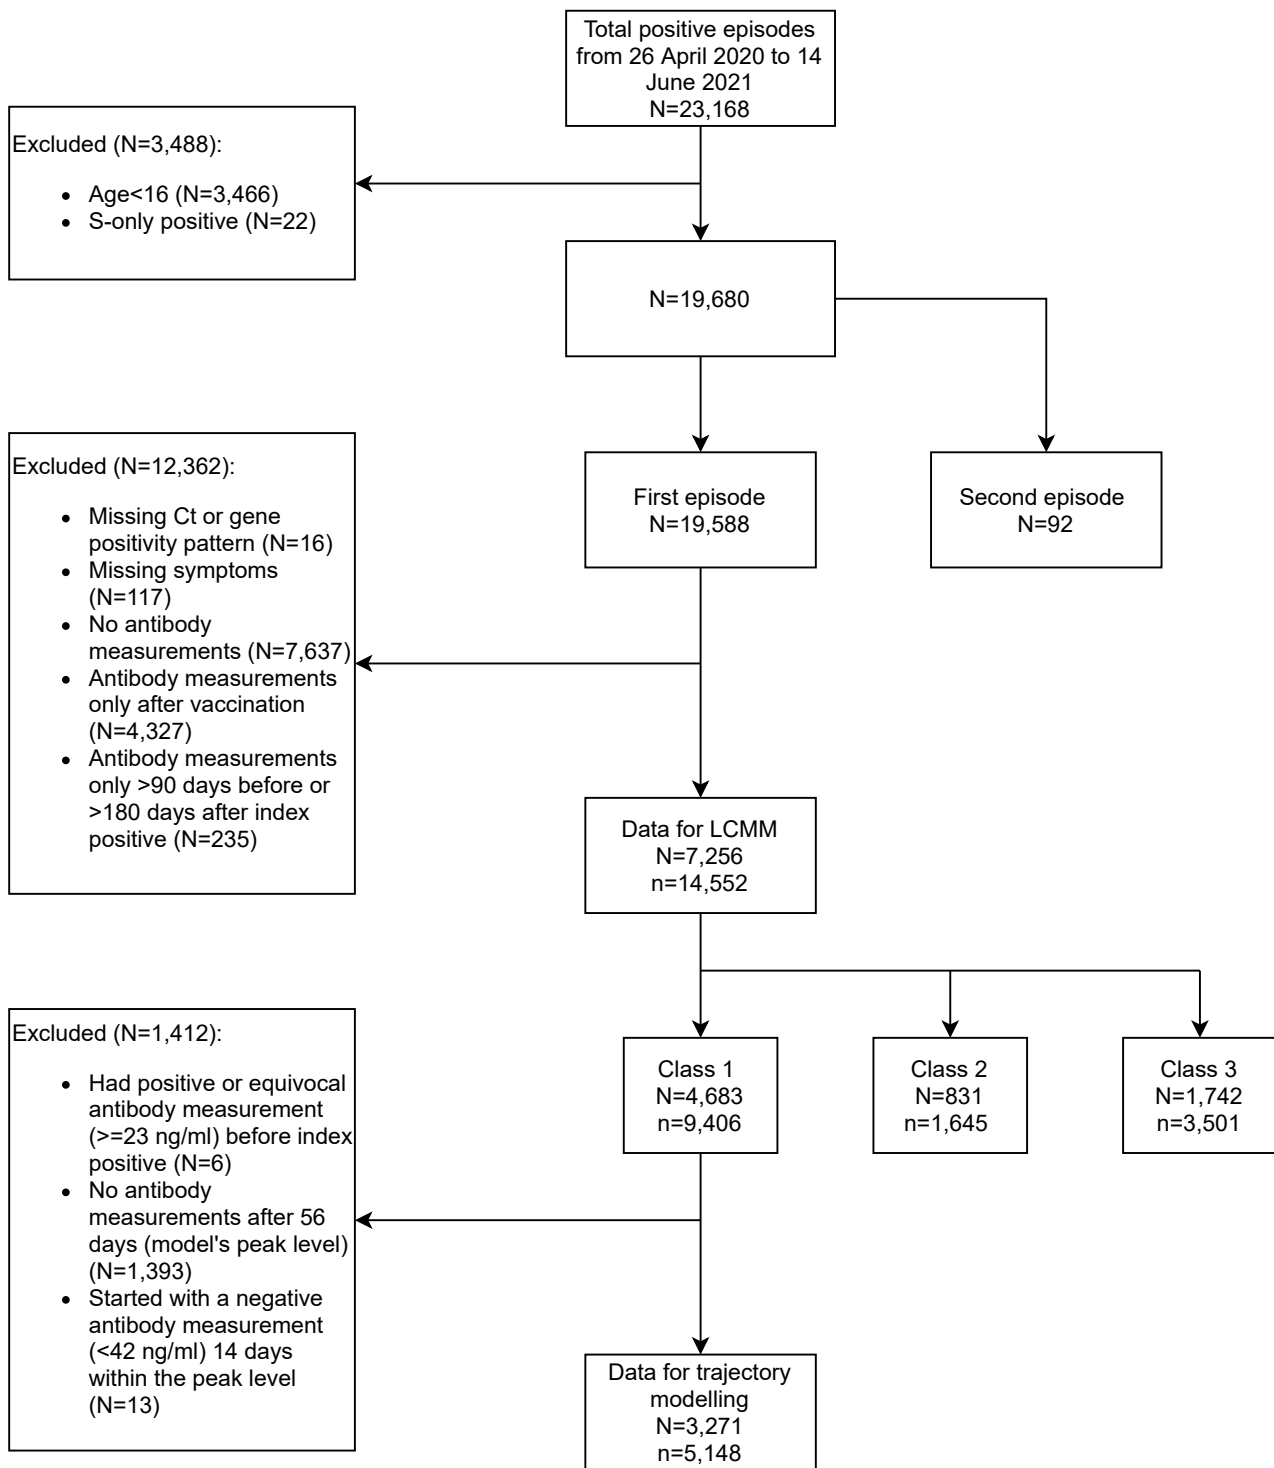

**Supplementary Fig. 1. Flowchart of the study cohort.** N represents the number of positive episodes/ participants, and n represents the number of antibody measurements. LCMM=latent class mixed model. Class 1='seroconverted in response to infection', Class 2='possible late/ reinfection', Class 3='seronegative non-responders', see Fig. 1 and Supplementary Fig. 3.

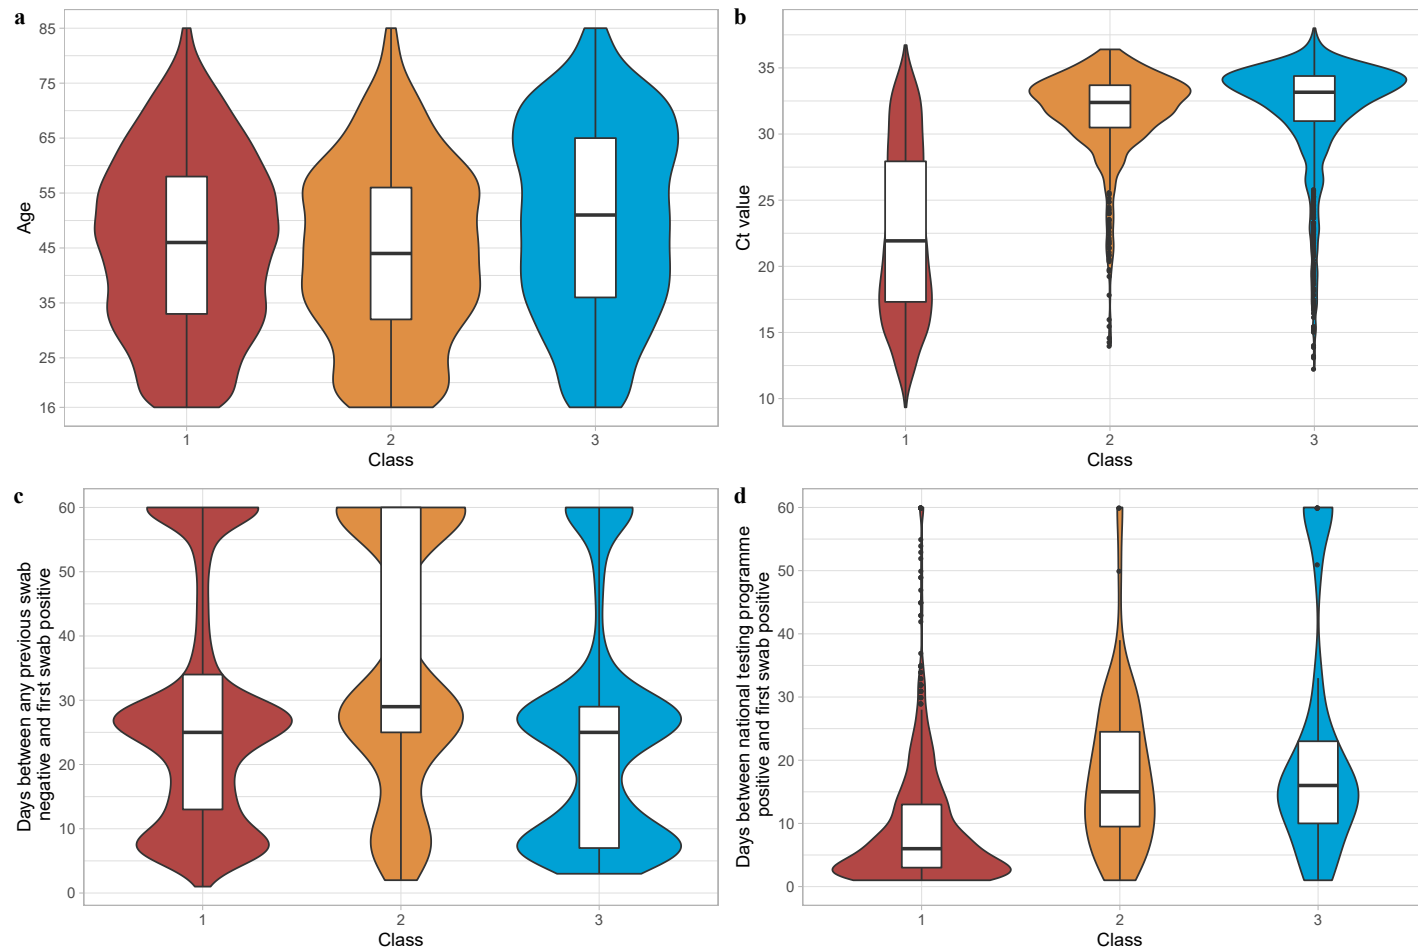

**Supplementary Fig. 2. Distributions of continuous variables by classes identified from latent class mixed models.** **a**, Participants' age. Participants in Class 3 were older than Class 1 and 2. **b**, Participants' minimum Ct value across the infection episode. Class 1 had a lower Ct value than Class 2 and 3. **c**, Days between any previous study swab negative test and the first swab positive test in the infection episode. More participants in Class 2 had a longer duration between previous negative swab and the index positive, supporting late detection. **d**, Days between any preceding national testing programme positive test and the first swab positive test (y-axis truncated at 60 days for visualisation). Class 1 had a shorter duration between the two tests than other two classes. Class 1='seroconverted in response to infection' (N=4,683, 64.5%), Class 2='possible late/reinfection' (N=831, 11.5%), Class 3='seronegative non-responders' (N=1,742, 24.0%). For the box and whisker inserts: centre line, median; box limits, upper and lower quartiles; whiskers, 1.5x interquartile range; points, outliers.

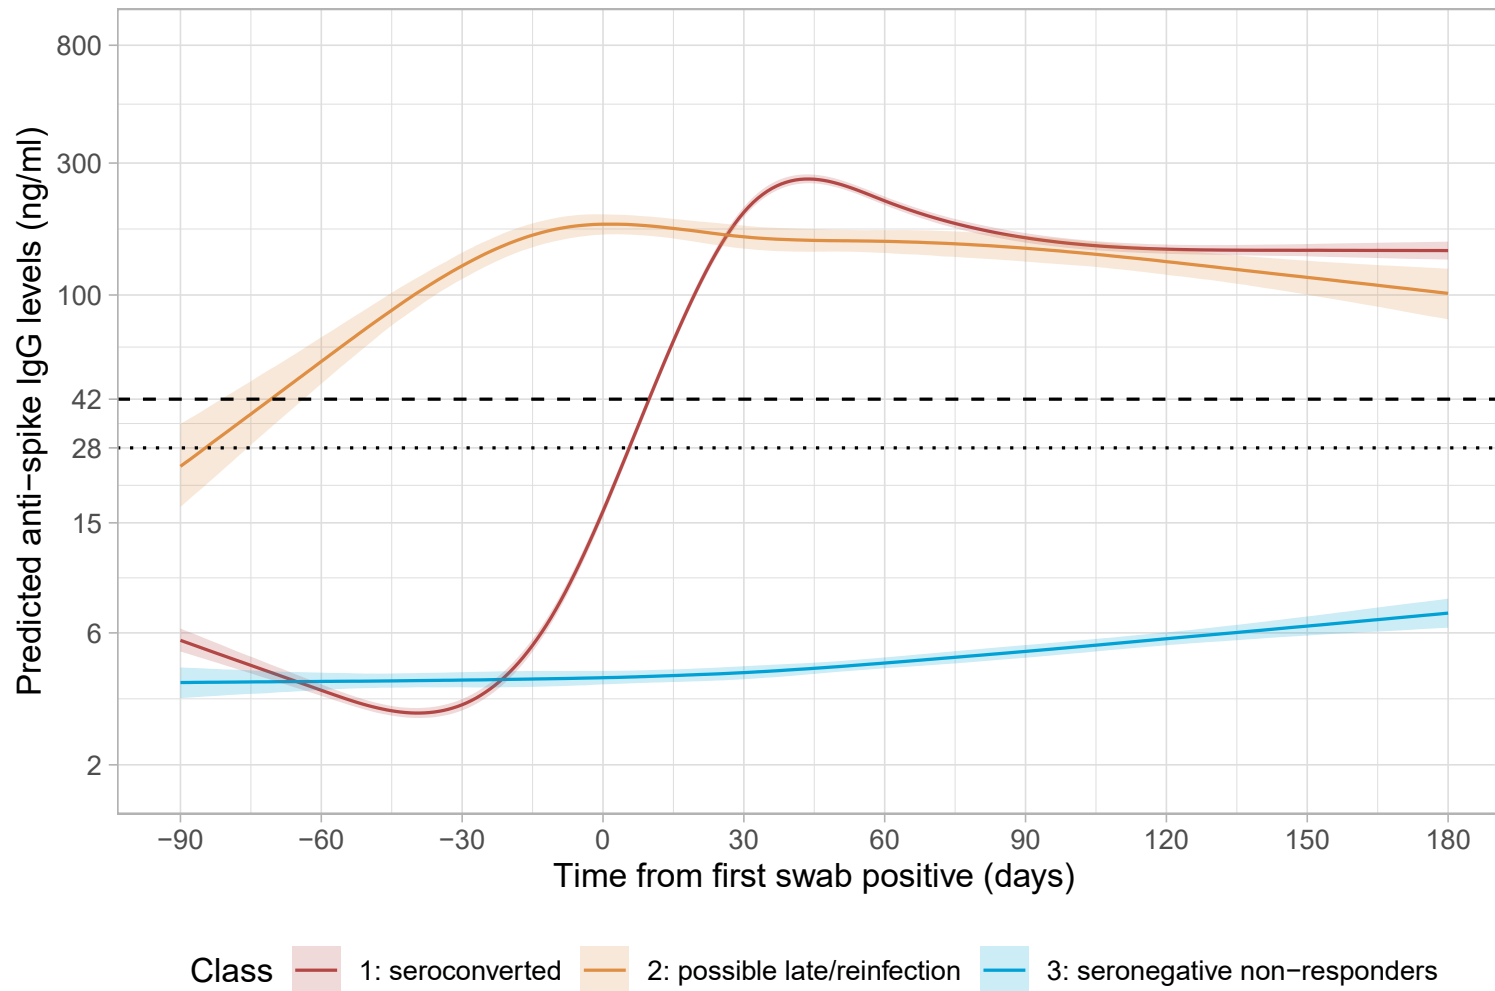

**Supplementary Fig. 3. Predicted mean anti-spike IgG trajectories in participants with natural SARS-CoV-2 infection from latent class mixed models in 7,256 participants (with standard error of the prediction).** Black dashed line indicates the assay threshold for IgG positivity ( $42 \text{ ng ml}^{-1}$ ) and the dotted line at  $28 \text{ ng ml}^{-1}$  indicates level associated with 50% protection against reinfection. The 95% confidence interval are calculated by a Monte Carlo approximation of the posterior distribution of the predicted values. Class 1='seroconverted in response to infection' (64.5%,  $n=4683$ ), Class 2='possible late/reinfection' (11.5%,  $n=831$ ), Class 3='seronegative non-responders' (24.0%,  $n=1742$ ).



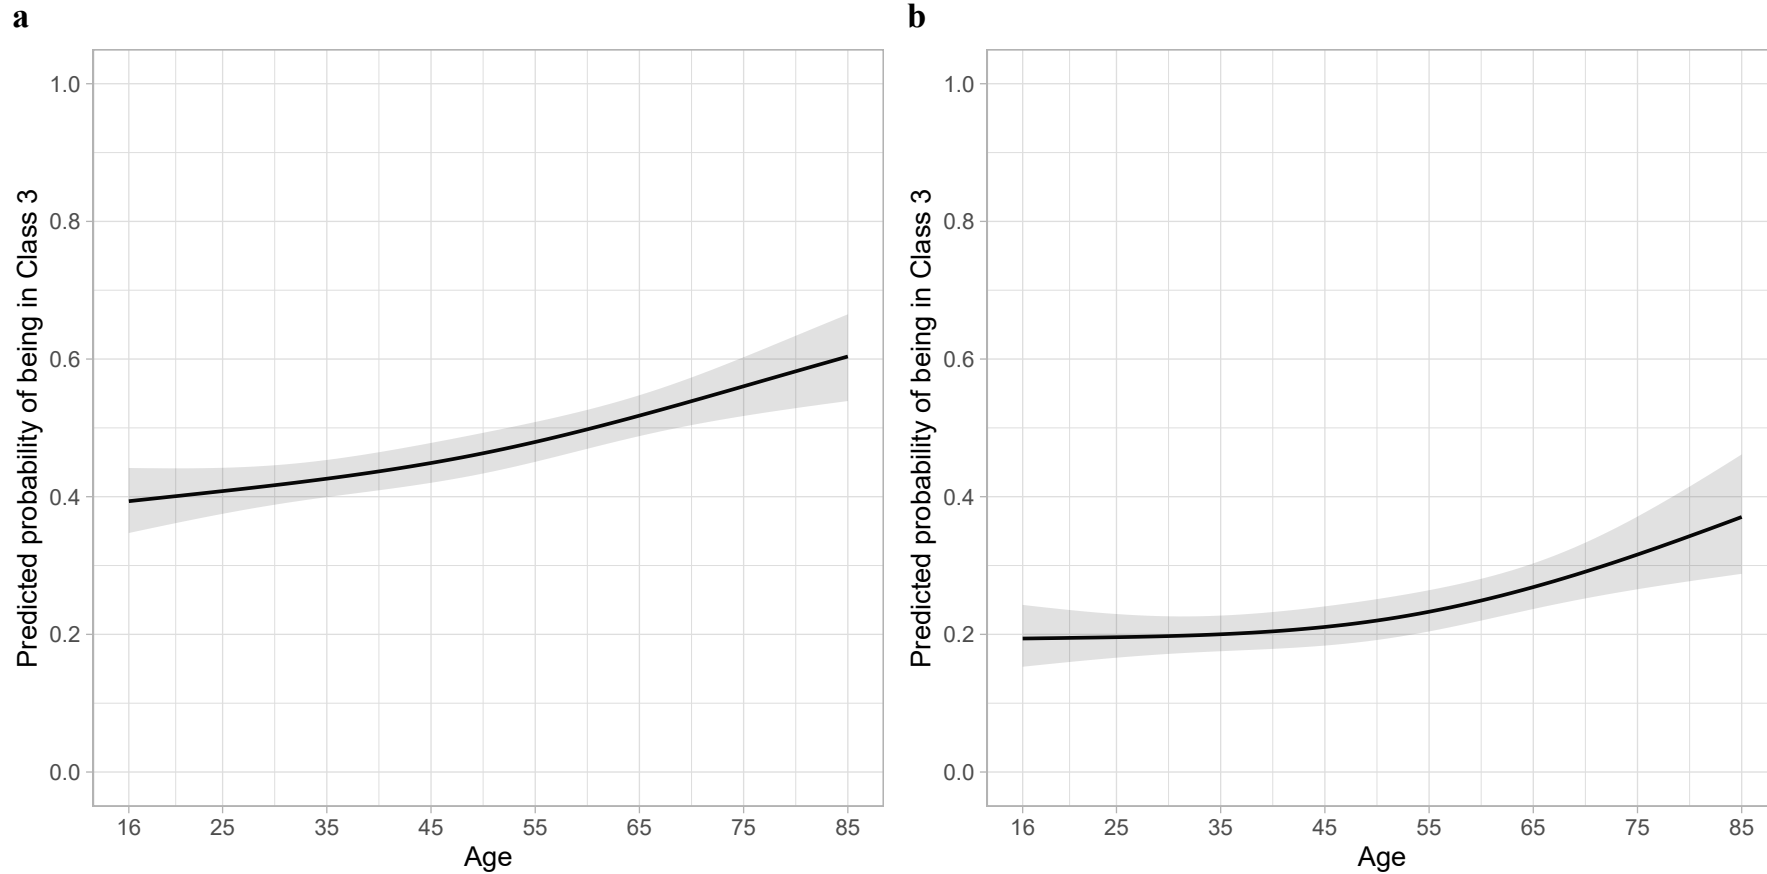

**Supplementary Fig. 4. Predicted probability of being in Class 3 (seronegative) compared with Class 1 (seroconverted) by age.** Plotted at the reference category for other variables (female, white ethnicity, no long-term health condition, not working in patient-facing healthcare, no self-reported symptoms of any kind). **a**, Using all data from Class 3 (N=1,742). **b**, Conditioning on Ct value  $\leq 32$  and  $\geq 2$  genes detected (N=595) to decrease the impact of potential false positive swab tests. Age was fitted using natural cubic spline with one internal knot placed at 50 years and two boundary knots at 20, 80 years. Full model's results are presented in **Fig. 3, Supplementary Table 3**. The 95% confidence intervals are calculated by prediction  $\pm 1.96$ \*standard error of the prediction.

**a**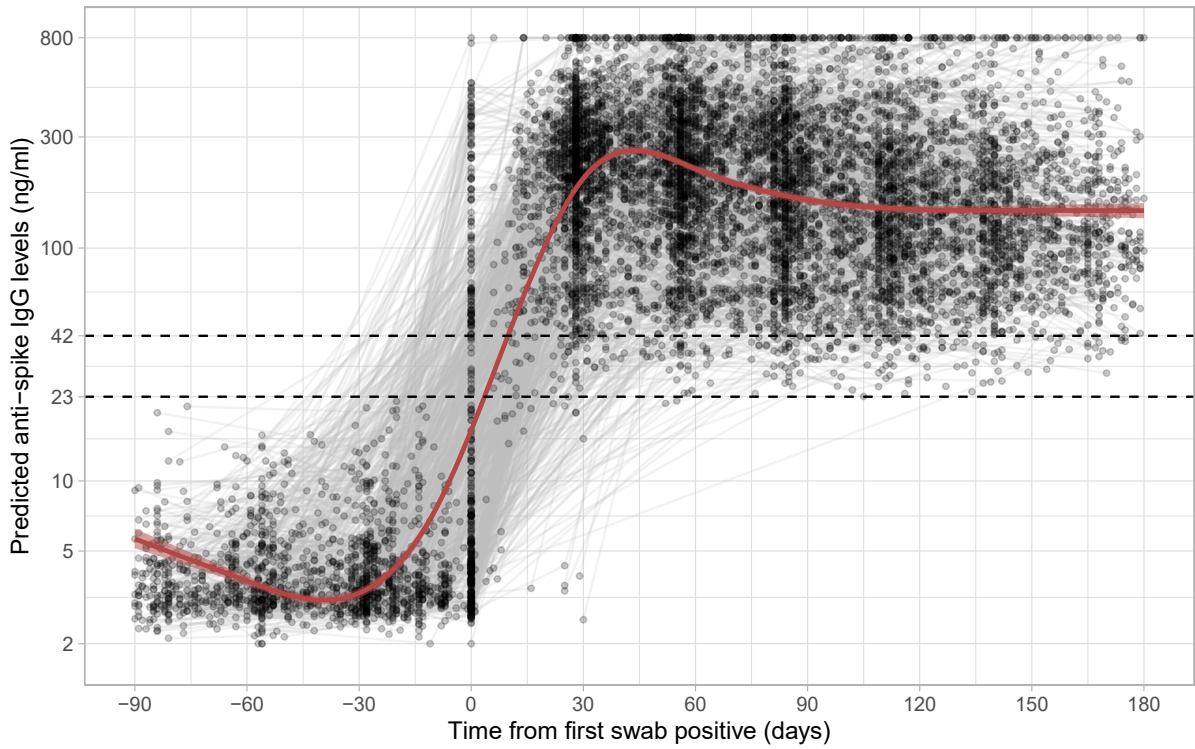**b**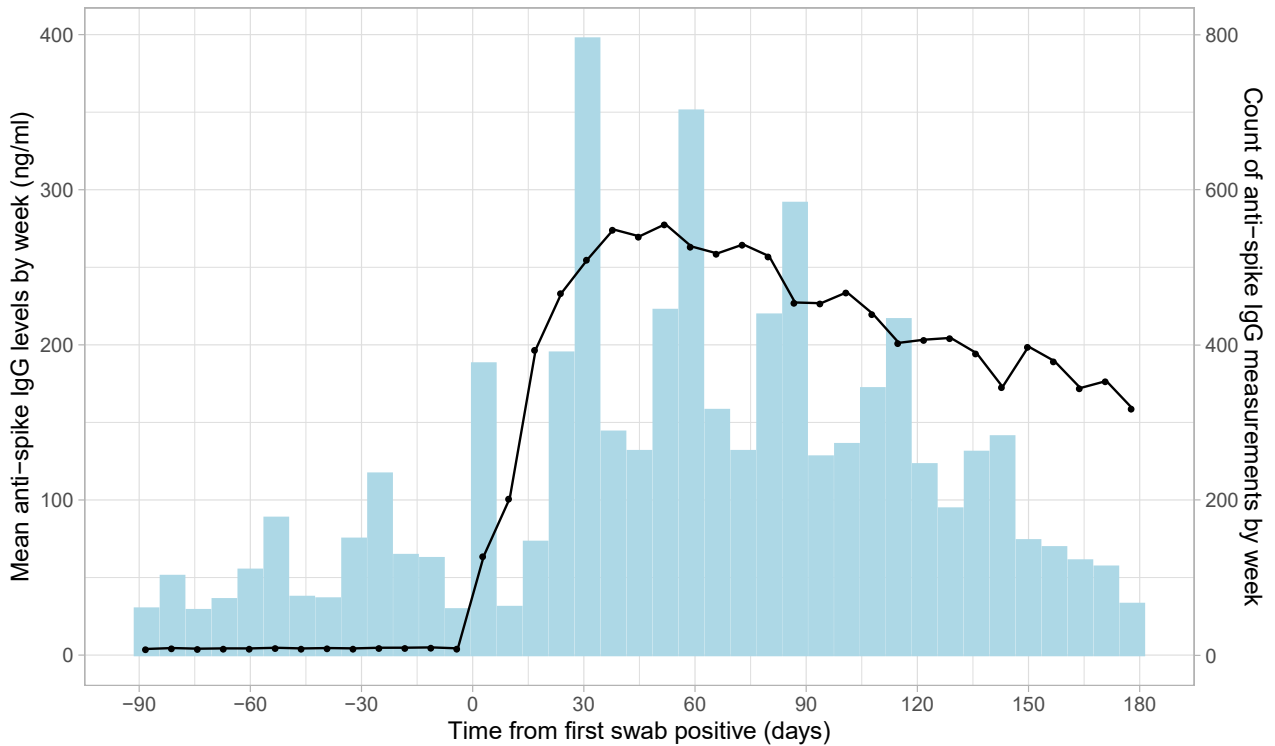

**Supplementary Fig. 5. Determination of the ‘peak level’ for modelling anti-spike IgG trajectories. a,** Class trajectory and individual trajectories for participants included in the model from Class 1. **b,** Mean anti-spike IgG levels and count of IgG measurements by week after index positive test. Around 56 days (8 weeks), the number of IgG measurements is high, and the mean IgG levels are close to the highest level.

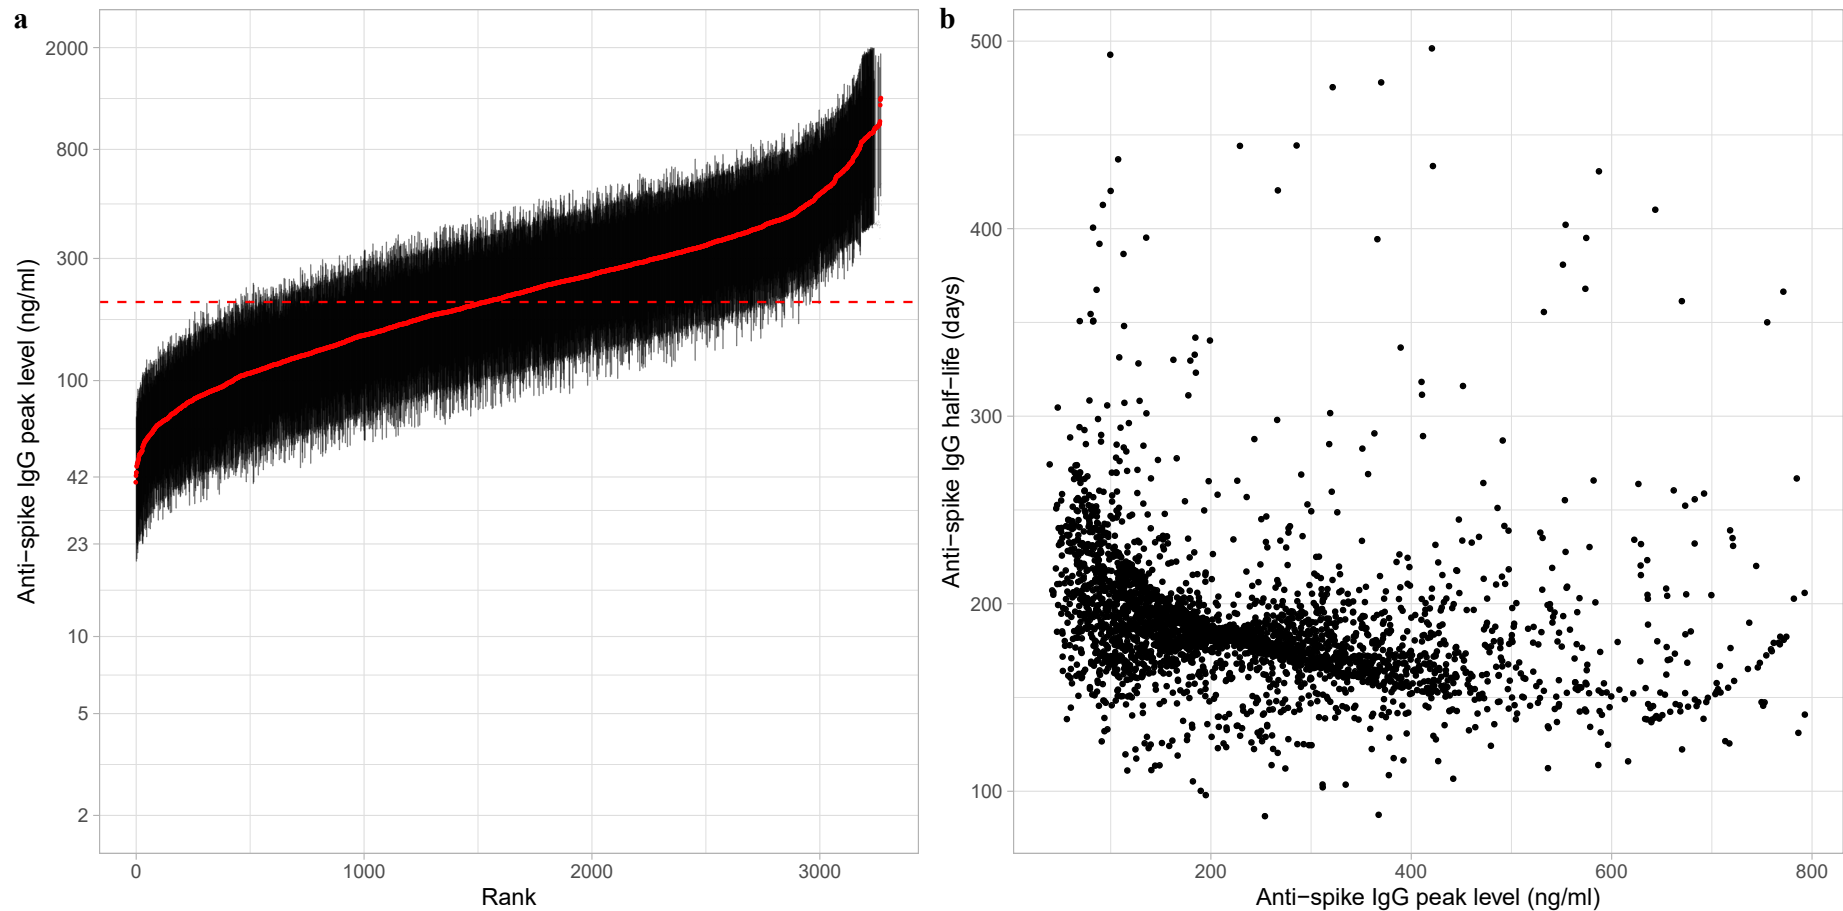

**Supplementary Fig. 6. Posterior estimations for individual anti-spike IgG half-lives and peak level.** **a**, Estimated peak anti-spike IgG level with 95% CrI for all participants (N=3,271) by rank. The red dot shows the mean level in each individual. The red dashed line shows the overall mean level (203 ng ml<sup>-1</sup>). **b**, Relationship between estimated IgG peak levels with half-lives. X and Y axes are truncated at 800 and 500 for visualization (Two-sided Spearman correlation test. Spearman's rank coefficient=-0.5, p<0.0001).

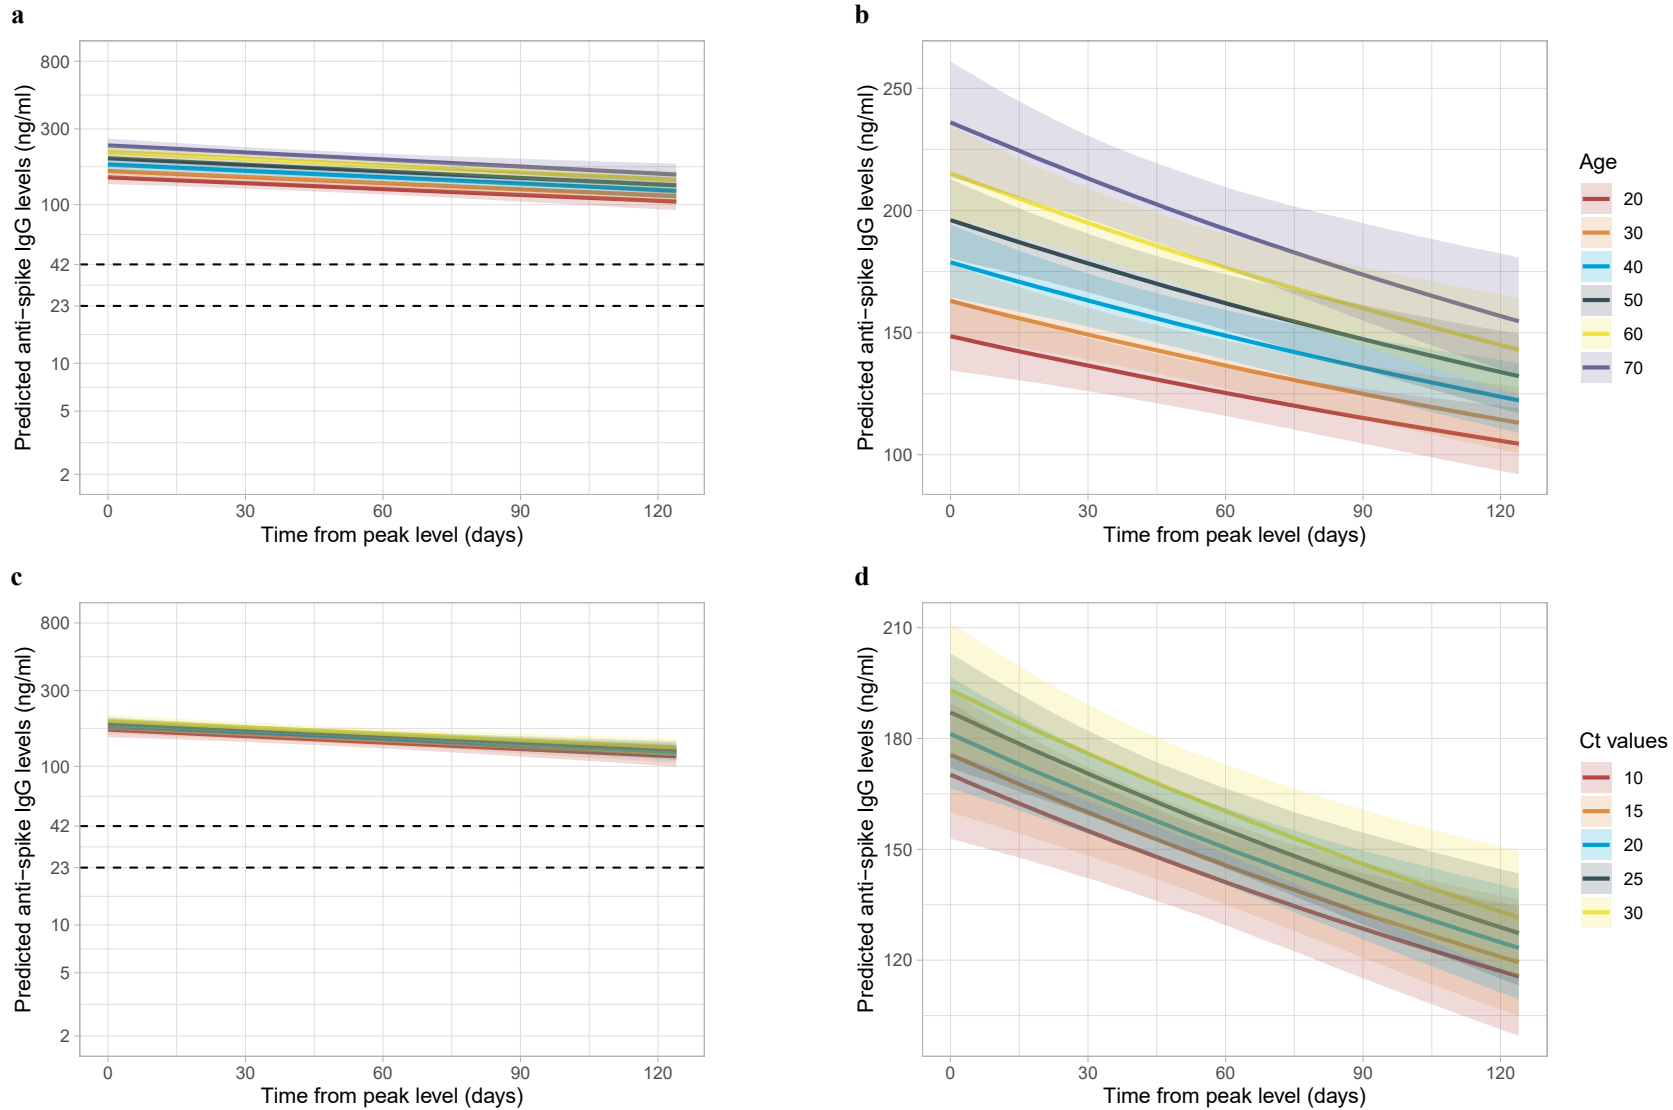

**Supplementary Fig. 7. Posterior mean trajectories with 95% credibility intervals of anti-spike IgG after the peak level by age (a, b) and Ct values (c, d) in the multivariable model in 3,271 participants.** Panel a and c show the relationship on the log<sub>10</sub> scale. Black dashed line indicates the assay threshold for IgG positivity (42 ng ml<sup>-1</sup>) and the dotted line at 28 ng ml<sup>-1</sup> (indicates level associated with 50 % protection against reinfection). Panel b and d show the relationship in its original scale. Full model results are shown in **Table 2**.

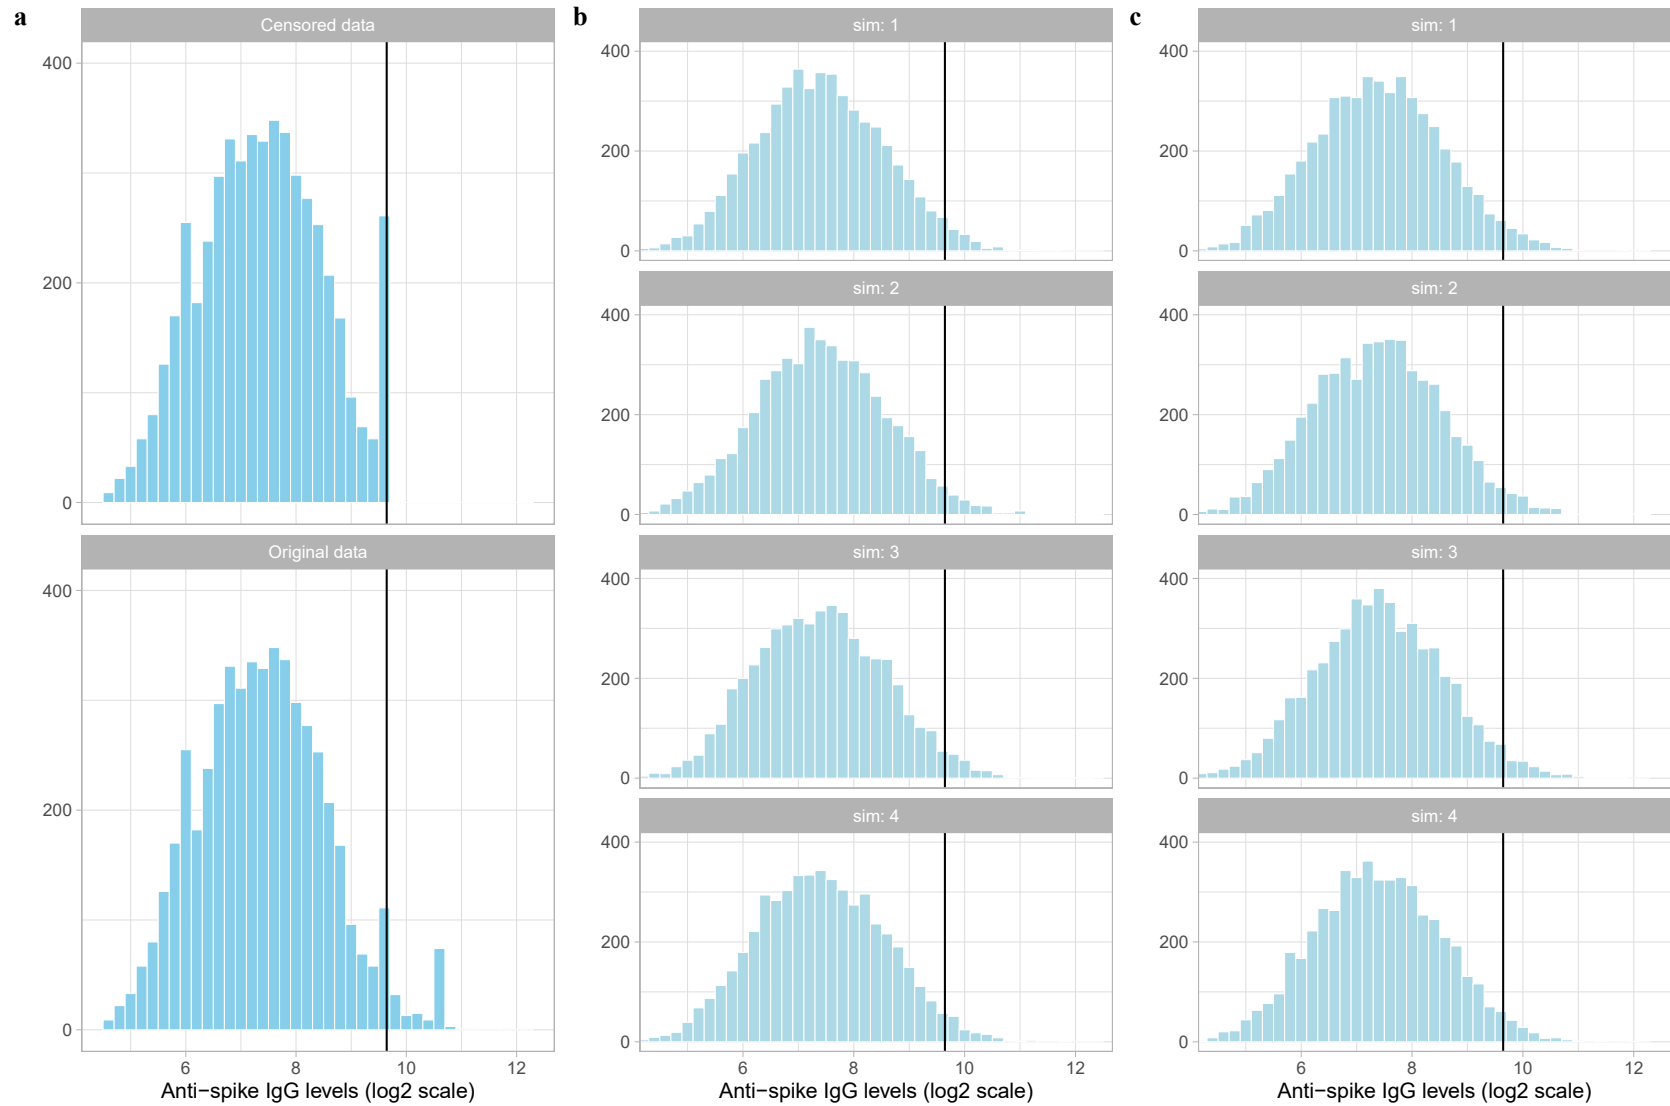

**Supplementary Fig. 8. Posterior predictive check for the baseline model and the multivariable model. a**, Distribution of the observed anti-spike IgG levels on log<sub>2</sub> scale. **b**, Distribution of anti-spike IgG levels from four posterior simulated datasets for the baseline model. **c**, Distribution of anti-spike IgG levels from four posterior simulated datasets for the multivariable model.

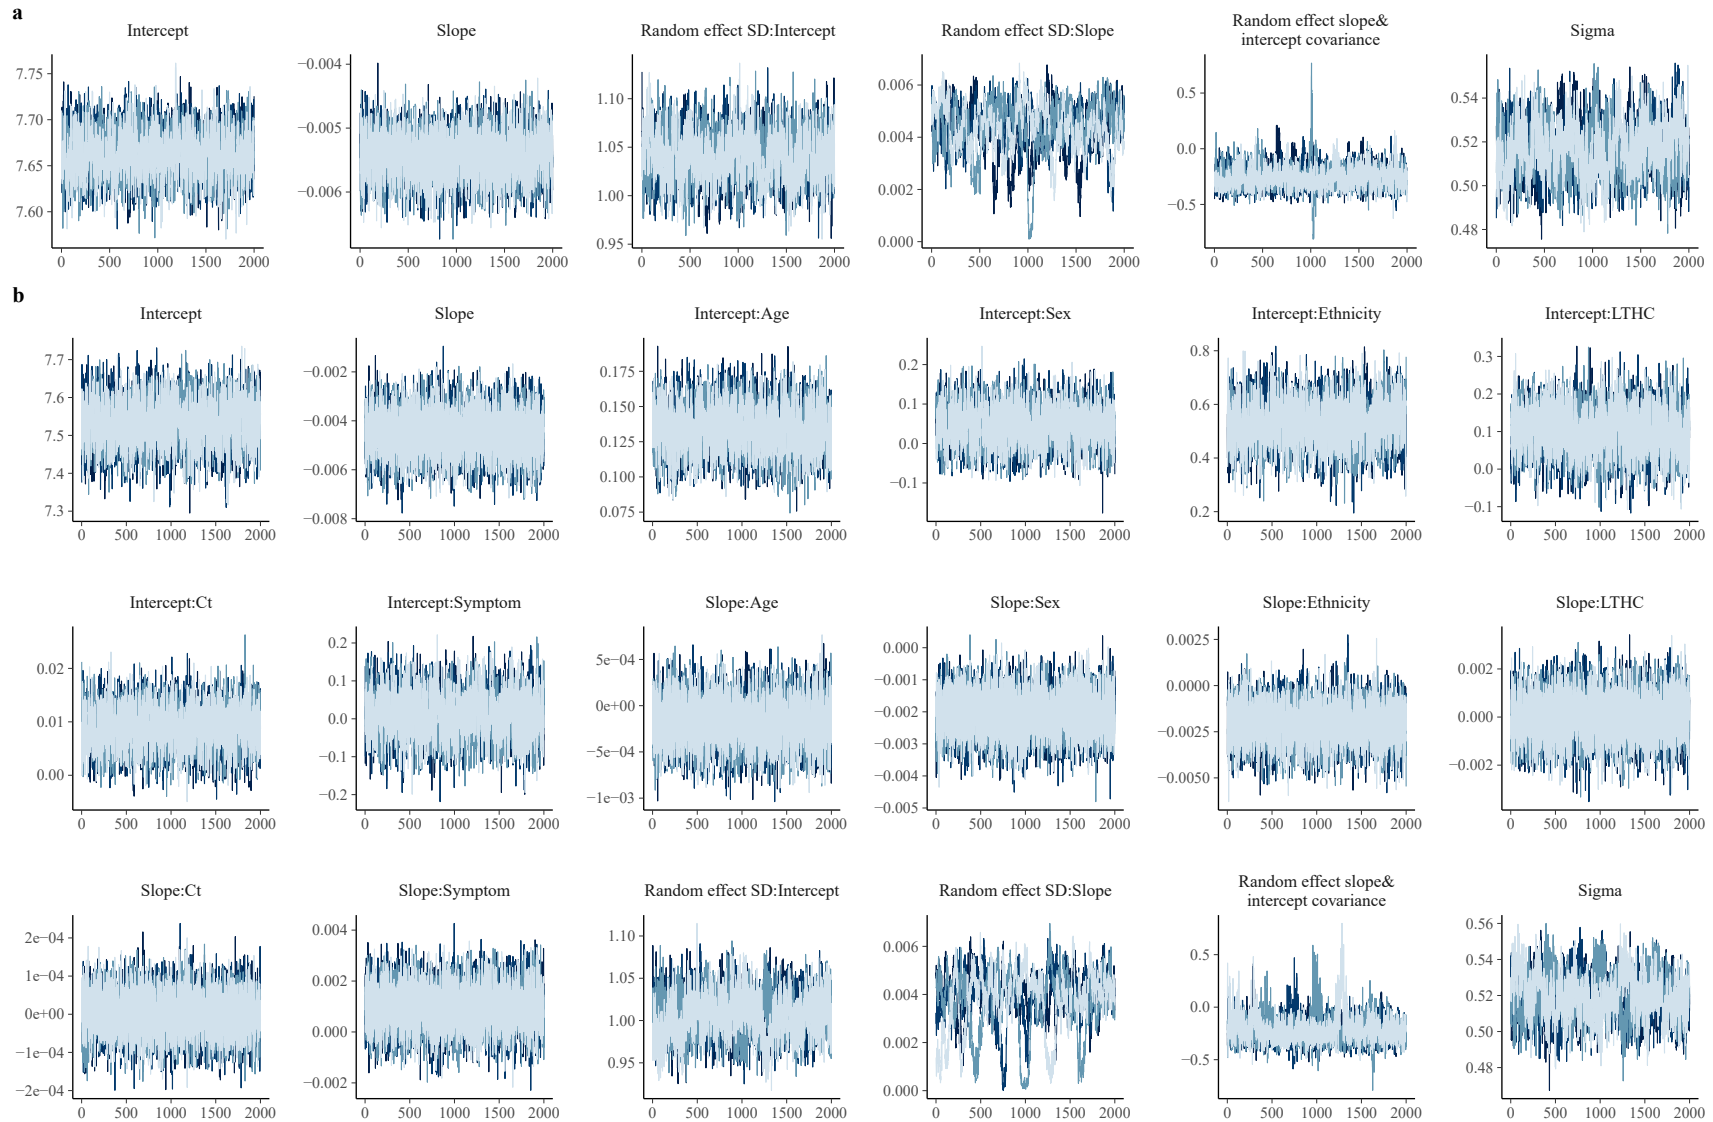

**Supplementary Fig. 9. MCMC trace plots for assessing convergence of chains. a,** Trace plots for the baseline model. **b,** Trace plots for the multinomial model.

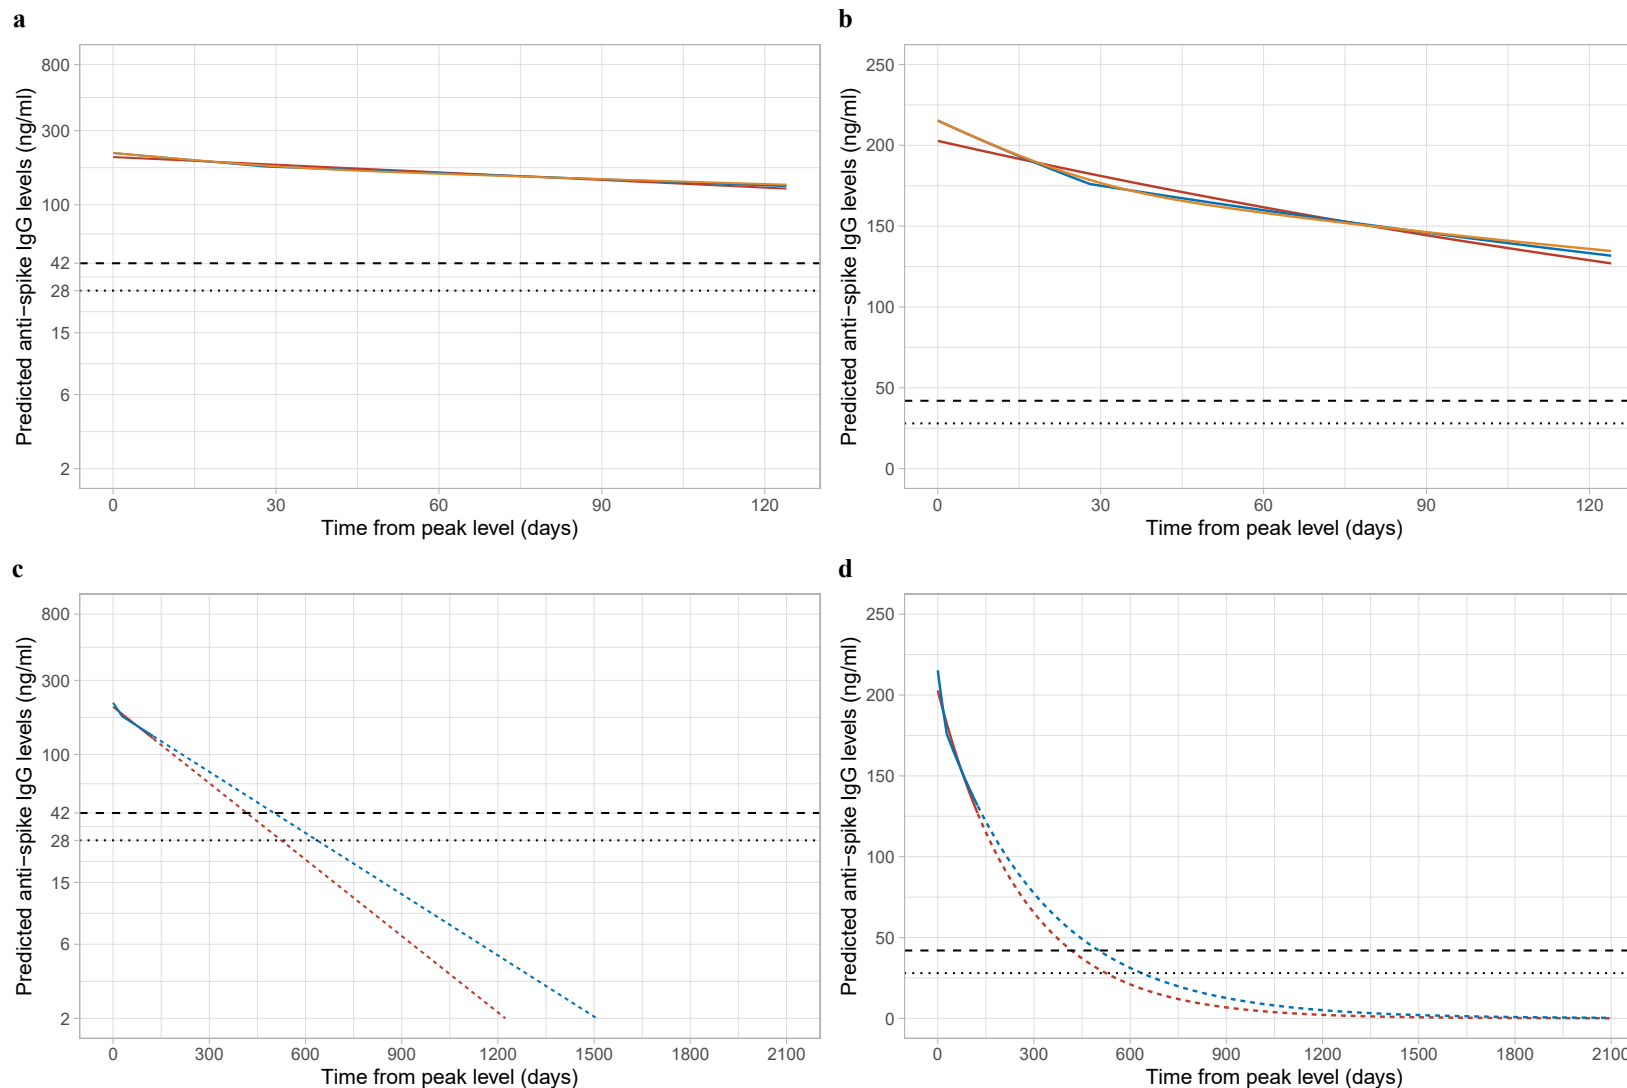

**Supplementary Fig. 10. Comparison of anti-spike IgG decline in 3,271 participants among the model assuming a linear decline in log<sub>2</sub> scale (red line), the biphasic exponential model (blue line), and the model using splines (orange line). For the biphasic model, knot is placed at 28 days. For the spline model, time is fitted using natural cubic splines with internal knots at 30, 70 and boundary knots at 5, 110. Panel a, b show the antibody trajectories from the three models within observed period (124 days). Panel c, d show the predicted trajectories from the linear and biphasic models over 2100 days (dotted line indicates the values are extrapolated). Panel a, c shows the trajectory on the log<sub>10</sub> scale. Panel b, d shows the trajectory in its original scale. Black dashed line indicates the assay threshold for IgG positivity (42 ng ml<sup>-1</sup>) and the dotted line at 28 ng ml<sup>-1</sup> (indicates level associated with 50 % protection against reinfection). The spline model had the lowest LOOIC (11402), followed by the biphasic model (11594), and the linear model (11819).**

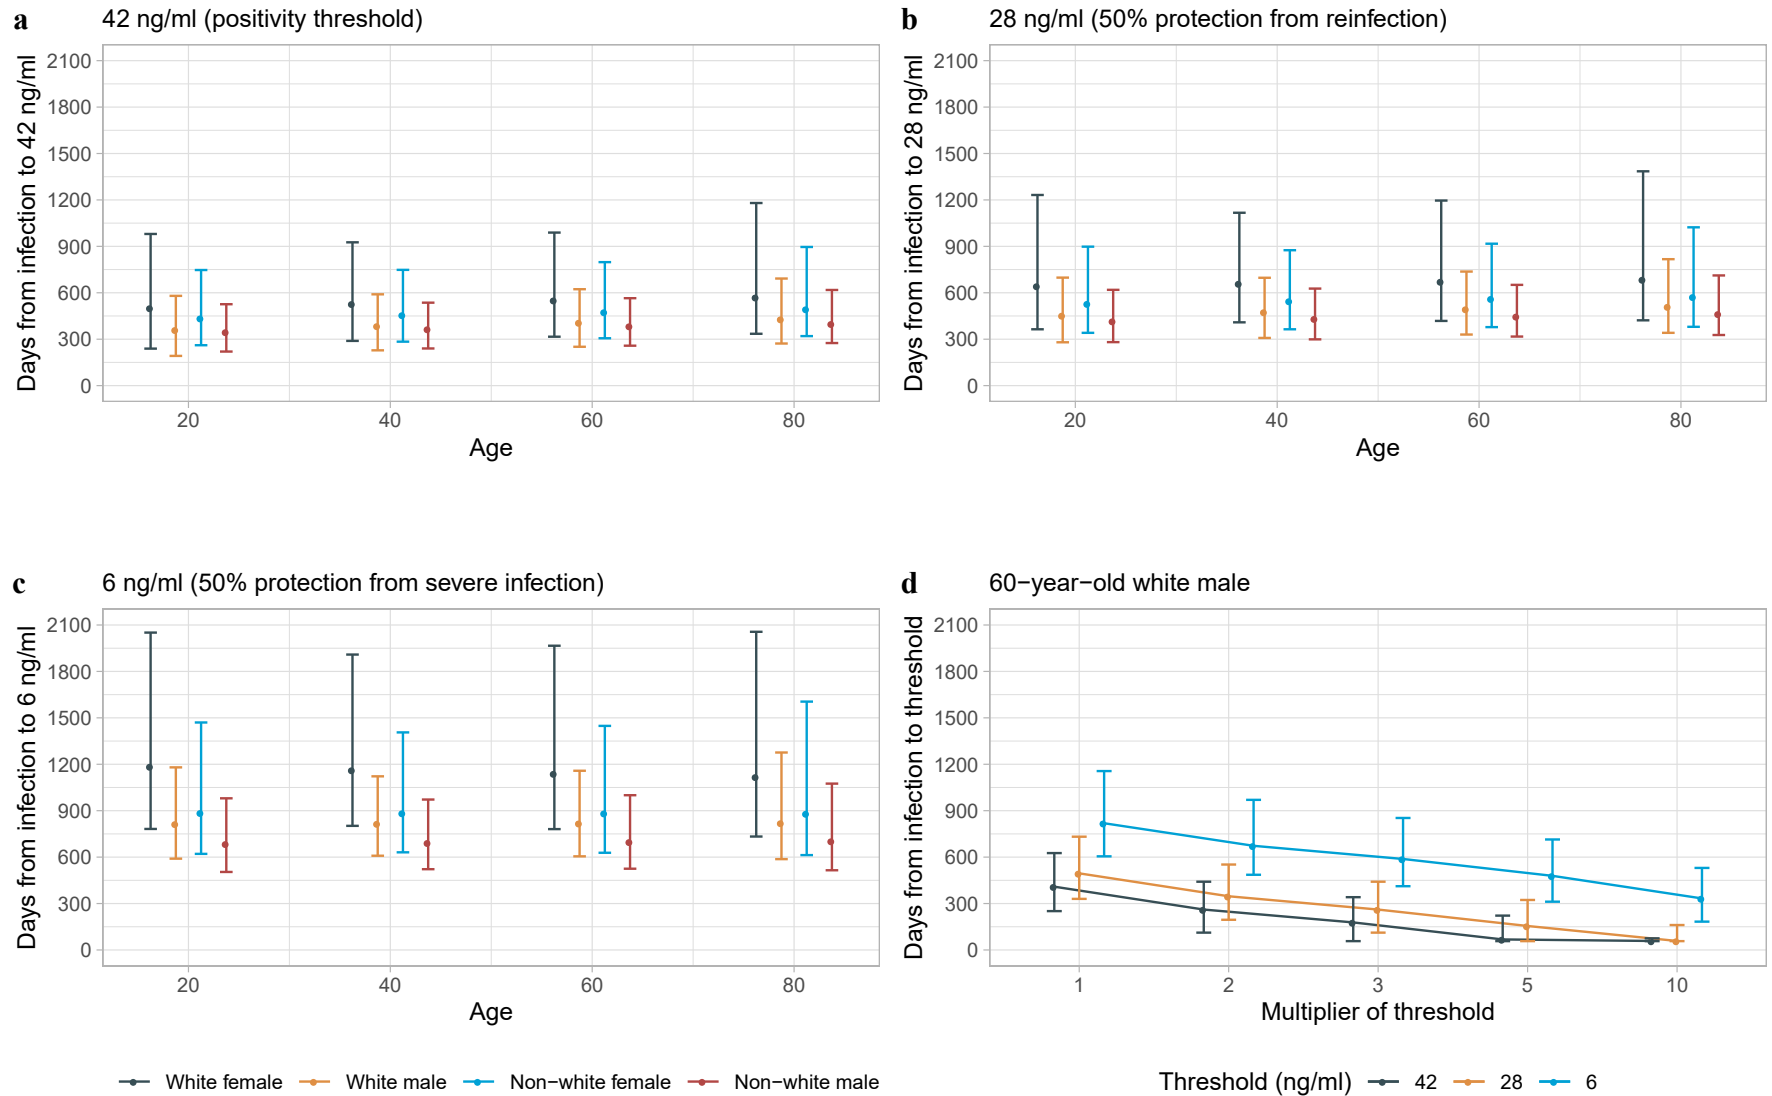

**Supplementary Fig. 11. Posterior predicted time (95% credibility interval) the start of infection to three anti-spike IgG thresholds (42, 28, and 6 ng ml<sup>-1</sup>) by age (20, 40, 60, 80 years), sex, and ethnicity from the multivariable linear model in 3271 participants. a**, Time from the start of infection to the positivity threshold of 42 ng ml<sup>-1</sup>. **b**, Time from the start of infection to the equivocal threshold of 28 ng ml<sup>-1</sup>, which corresponds to 50% protection against PCR-confirmed reinfection. **c**, Time from the start of infection to 6 ng ml<sup>-1</sup>, which corresponds to 50% protection against severe infection. **d**, Time from the start of infection to the above three thresholds multiplied by 2, 3, 5, and 10, in a 60-year-old white male as an example, to estimate the duration given the higher antibody level required for protection against variants of concern. Estimations are shown in **Supplementary Table 8**.
